# Supplementary material for: The pressure to breed: intraspecific interactions of different goose species during spring stopover reflect mate guarding and proximity to nesting dates
Source: Research Square preprint supplement (doi:10.21203/rs.3.rs-7593212/v1), 2025-11-06
Supplement: Supplementary file 1 [file 504b92102b7ebafb4936220f.xlsx]

## Sheet: Raw_data
flock_id	Date	time	datetime	spec	doy	hour	flock_size	habitat	yes_agress	non_agress	same_species	same_agress	other_agress	agress_toward	abundance
1	2024-02-09	10:13	2024-02-09 10:13:00	Anser anser	40	10.2167	34	grassland	1	0	Yes	1	0	Anser anser	34
2	2024-02-09	11:23	2024-02-09 11:23:00	Anser albifrons	40	11.3833	55	grassland	0	1					10
2	2024-02-09	11:25	2024-02-09 11:25:00	Anser serrirostris	40	11.4167	55	grassland	0	1					45
3	2024-02-09	14:28	2024-02-09 14:28:00	Anser anser	40	14.4667	12	grassland	0	1					12
4	2024-02-09	14:54	2024-02-09 14:54:00	Anser serrirostris	40	14.9	398	grassland	0	1					370
4	2024-02-09	14:55	2024-02-09 14:55:00	Anser albifrons	40	14.9167	398	grassland	0	1					25
4	2024-02-09	14:55	2024-02-09 14:55:00	Anser anser	40	14.9167	398	grassland	0	1					2
5	2024-02-09	15:06	2024-02-09 15:06:00	Anser anser	40	15.1	15	winter cereals	0	1					15
6	2024-02-09	15:26	2024-02-09 15:26:00	Anser anser	40	15.4333	47	winter cereals	0	1					2
6	2024-02-09	15:26	2024-02-09 15:26:00	Anser anser	40	15.4333	47	grassland	2	0	Yes	2	0	Anser anser	45
7	2024-02-09	15:37	2024-02-09 15:37:00	Anser anser	40	15.6167	9	grassland	0	1					9
8	2024-02-09	15:46	2024-02-09 15:46:00	Anser anser	40	15.7667	400	grassland	2	0	Yes	2	0	Anser anser	260
8	2024-02-09	15:47	2024-02-09 15:47:00	Anser albifrons	40	15.7833	400	grassland	0	1					10
8	2024-02-09	15:47	2024-02-09 15:47:00	Anser serrirostris	40	15.7833	400	grassland	0	1					130
9	2024-02-09	15:58	2024-02-09 15:58:00	Anser anser	40	15.9667	420	grassland	1	0	Yes	1	0	Anser anser	250
9	2024-02-09	15:59	2024-02-09 15:59:00	Anser albifrons	40	15.9833	420	grassland	0	1					10
9	2024-02-09	15:59	2024-02-09 15:59:00	Anser anser	40	15.9833	420	grassland	0	1					160
10	2024-02-09	16:04	2024-02-09 16:04:00	Anser anser	40	16.0667	541	grassland	1	0	Yes	1	0	Anser anser	245
10	2024-02-09	16:04	2024-02-09 16:04:00	Anser serrirostris	40	16.0667	541	grassland	0	1					130
10	2024-02-09	16:06	2024-02-09 16:06:00	Anser anser	40	16.1	541	other	0	1					145
10	2024-02-09	16:07	2024-02-09 16:07:00	Anser albifrons	40	16.1167	541	other	0	1					1
10	2024-02-09	16:07	2024-02-09 16:07:00	Anser serrirostris	40	16.1167	541	other	0	1					20
11	2024-02-13	08:03	2024-02-13 08:03:00	Anser serrirostris	44	8.05	953	grassland	0	1					480
11	2024-02-13	08:04	2024-02-13 08:04:00	Anser albifrons	44	8.06667	953	grassland	0	1					10
11	2024-02-13	08:06	2024-02-13 08:06:00	Anser albifrons	44	8.1	953	winter cereals	0	1					20
11	2024-02-13	08:07	2024-02-13 08:07:00	Anser serrirostris	44	8.11667	953	winter cereals	0	1					160
11	2024-02-13	08:08	2024-02-13 08:08:00	Anser albifrons	44	8.13333	953	grassland	0	1					30
11	2024-02-13	08:08	2024-02-13 08:08:00	Anser serrirostris	44	8.13333	953	grassland	1	0	Yes	1	0	Anser serrirostris	250
11	2024-02-13	08:10	2024-02-13 08:10:00	Anser anser	44	8.16667	953	grassland	0	1					3
12	2024-02-13	08:55	2024-02-13 08:55:00	Anser anser	44	8.91667	45	winter cereals	0	1					15
12	2024-02-13	08:56	2024-02-13 08:56:00	Anser serrirostris	44	8.93333	45	winter cereals	0	1					30
13	2024-02-13	09:10	2024-02-13 09:10:00	Anser anser	44	9.16667	44	other	0	1					4
13	2024-02-13	09:11	2024-02-13 09:11:00	Anser serrirostris	44	9.18333	44	other	0	1					20
13	2024-02-13	09:12	2024-02-13 09:12:00	Anser anser	44	9.2	44	winter cereals	0	1					11
13	2024-02-13	09:12	2024-02-13 09:12:00	Anser serrirostris	44	9.2	44	winter cereals	0	1					2
13	2024-02-13	09:13	2024-02-13 09:13:00	Anser anser	44	9.21667	44	grassland	0	1					6
14	2024-02-13	09:46	2024-02-13 09:46:00	Anser anser	44	9.76667	25	grassland	1	0	Yes	1	0	Anser anser	25
15	2024-02-13	09:56	2024-02-13 09:56:00	Anser anser	44	9.93333	17	grassland	1	0	Yes	1	0	Anser anser	17
16	2024-02-13	10:06	2024-02-13 10:06:00	Anser albifrons	44	10.1	71	other	0	1					3
16	2024-02-13	10:06	2024-02-13 10:06:00	Anser serrirostris	44	10.1	71	other	0	1					3
17	2024-02-13	10:06	2024-02-13 10:06:00	Anser anser	44	10.1	142	other	0	1					40
16	2024-02-13	10:07	2024-02-13 10:07:00	Anser anser	44	10.1167	71	grassland	1	0	Yes	1	0	Anser anser	45
16	2024-02-13	10:08	2024-02-13 10:08:00	Anser serrirostris	44	10.1333	71	grassland	0	1					20
17	2024-02-13	10:42	2024-02-13 10:42:00	Anser anser	44	10.7	142	winter cereals	4	0	Yes	4	0	Anser anser	27
17	2024-02-13	10:57	2024-02-13 10:57:00	Anser anser	44	10.95	142	grassland	1	0	Yes	1	0	Anser anser	75
18	2024-02-13	11:43	2024-02-13 11:43:00	Anser anser	44	11.7167	395	grassland	1	0	Yes	1	0	Anser anser	370
18	2024-02-13	11:44	2024-02-13 11:44:00	Anser albifrons	44	11.7333	395	grassland	0	1					15
18	2024-02-13	11:44	2024-02-13 11:44:00	Anser serrirostris	44	11.7333	395	grassland	0	1					10
19	2024-02-13	12:14	2024-02-13 12:14:00	Anser anser	44	12.2333	630	grassland	0	1					140
19	2024-02-13	12:19	2024-02-13 12:19:00	Anser albifrons	44	12.3167	630	grassland	0	1					30
19	2024-02-13	12:19	2024-02-13 12:19:00	Anser serrirostris	44	12.3167	630	grassland	1	0	Yes	1	0	Anser serrirostris	450
19	2024-02-13	12:29	2024-02-13 12:29:00	Anser anser	44	12.4833	630	winter cereals	1	0	Yes	1	0	Anser anser	8
20	2024-02-13	12:53	2024-02-13 12:53:00	Anser anser	44	12.8833	70	grassland	0	1					60
20	2024-02-13	12:54	2024-02-13 12:54:00	Anser albifrons	44	12.9	70	grassland	0	1					5
20	2024-02-13	12:54	2024-02-13 12:54:00	Anser serrirostris	44	12.9	70	grassland	0	1					5
21	2024-02-13	13:00	2024-02-13 13:00:00	Anser anser	44	13	214	other	1	0	Yes	1	0	Anser anser	45
21	2024-02-13	13:00	2024-02-13 13:00:00	Anser anser	44	13	214	grassland	0	1					17
21	2024-02-13	13:01	2024-02-13 13:01:00	Anser anser	44	13.0167	214	grassland	1	0	Yes	1	0	Anser anser	150
21	2024-02-13	13:02	2024-02-13 13:02:00	Anser serrirostris	44	13.0333	214	other	0	1					2
22	2024-02-13	14:25	2024-02-13 14:25:00	Anser anser	44	14.4167	26	grassland	1	0	Yes	1	0	Anser anser	23
22	2024-02-13	14:26	2024-02-13 14:26:00	Anser anser	44	14.4333	26	winter cereals	0	1					3
23	2024-02-13	14:33	2024-02-13 14:33:00	Anser albifrons	44	14.55	390	winter cereals	0	1					210
23	2024-02-13	14:33	2024-02-13 14:33:00	Anser anser	44	14.55	390	winter cereals	1	0	Yes	1	0	Anser anser	60
23	2024-02-13	14:35	2024-02-13 14:35:00	Anser serrirostris	44	14.5833	390	winter cereals	0	1					120
24	2024-02-13	14:58	2024-02-13 14:58:00	Anser anser	44	14.9667	54	grassland	2	0	Yes	2	0	Anser anser	54
25	2024-02-13	15:11	2024-02-13 15:11:00	Anser albifrons	44	15.1833	238	other	0	1					1
25	2024-02-13	15:11	2024-02-13 15:11:00	Anser serrirostris	44	15.1833	238	other	0	1					80
25	2024-02-13	15:12	2024-02-13 15:12:00	Anser albifrons	44	15.2	238	winter cereals	0	1					70
25	2024-02-13	15:12	2024-02-13 15:12:00	Anser serrirostris	44	15.2	238	winter cereals	0	1					80
25	2024-02-13	15:18	2024-02-13 15:18:00	Anser anser	44	15.3	238	other	0	1					7
26	2024-02-13	16:05	2024-02-13 16:05:00	Anser serrirostris	44	16.0833	1570	winter cereals	2	0	Yes	2	0	Anser serrirostris	430
26	2024-02-13	16:07	2024-02-13 16:07:00	Anser albifrons	44	16.1167	1570	winter cereals	0	1					20
26	2024-02-13	16:08	2024-02-13 16:08:00	Anser albifrons	44	16.1333	1570	winter cereals	0	1					500
26	2024-02-13	16:08	2024-02-13 16:08:00	Anser serrirostris	44	16.1333	1570	winter cereals	0	1					600
26	2024-02-13	16:09	2024-02-13 16:09:00	Branta leucopsis	44	16.15	1570	winter cereals	0	1					17
27	2024-02-18	10:27	2024-02-18 10:27:00	Anser albifrons	49	10.45	393	grassland	0	1					70
27	2024-02-18	10:27	2024-02-18 10:27:00	Anser serrirostris	49	10.45	393	grassland	1	0	Yes	1	0	Anser serrirostris	220
27	2024-02-18	10:46	2024-02-18 10:46:00	Anser anser	49	10.7667	393	grassland	0	1					2
27	2024-02-18	10:46	2024-02-18 10:46:00	Anser anser	49	10.7667	393	other	1	0	No	0	1	Anser serrirostris	10
27	2024-02-18	10:48	2024-02-18 10:48:00	Anser serrirostris	49	10.8	393	other	0	1					90
28	2024-02-18	11:25	2024-02-18 11:25:00	Anser serrirostris	49	11.4167	135	grassland	1	0	Yes	1	0	Anser serrirostris	120
28	2024-02-18	11:26	2024-02-18 11:26:00	Anser albifrons	49	11.4333	135	grassland	0	1					15
29	2024-02-18	12:09	2024-02-18 12:09:00	Anser serrirostris	49	12.15	461	grassland	1	0	Yes	1	0	Anser serrirostris	420
29	2024-02-18	12:10	2024-02-18 12:10:00	Anser albifrons	49	12.1667	461	grassland	0	1					40
30	2024-02-18	13:03	2024-02-18 13:03:00	Anser anser	49	13.05	130	grassland	1	0	Yes	1	0	Anser anser	110
30	2024-02-18	13:04	2024-02-18 13:04:00	Anser albifrons	49	13.0667	130	grassland	0	1					10
30	2024-02-18	13:04	2024-02-18 13:04:00	Anser serrirostris	49	13.0667	130	grassland	0	1					10
31	2024-02-18	13:09	2024-02-18 13:09:00	Anser serrirostris	49	13.15	35	grassland	0	1					5
31	2024-02-18	13:10	2024-02-18 13:10:00	Anser anser	49	13.1667	35	grassland	1	0	Yes	1	0	Anser anser	30
32	2024-02-18	13:26	2024-02-18 13:26:00	Anser anser	49	13.4333	481	grassland	0	1					10
32	2024-02-18	13:27	2024-02-18 13:27:00	Anser albifrons	49	13.45	481	grassland	0	1					200
32	2024-02-18	13:27	2024-02-18 13:27:00	Anser serrirostris	49	13.45	481	grassland	0	1					260
32	2024-02-18	13:27	2024-02-18 13:27:00	Branta leucopsis	49	13.45	481	grassland	0	1					11
33	2024-02-18	13:28	2024-02-18 13:28:00	Anser anser	49	13.4667	25	grassland	0	1					25
34	2024-02-18	13:49	2024-02-18 13:49:00	Anser albifrons	49	13.8167	570	winter cereals	0	1					350
34	2024-02-18	13:50	2024-02-18 13:50:00	Anser anser	49	13.8333	570	winter cereals	0	1					20
34	2024-02-18	13:50	2024-02-18 13:50:00	Anser serrirostris	49	13.8333	570	winter cereals	0	1					200
35	2024-02-18	14:01	2024-02-18 14:01:00	Anser anser	49	14.0167	30	winter cereals	0	1					10
35	2024-02-18	14:02	2024-02-18 14:02:00	Anser anser	49	14.0333	30	grassland	0	1					20
36	2024-02-18	14:14	2024-02-18 14:14:00	Anser anser	49	14.2333	22	grassland	1	0	Yes	1	0	Anser anser	20
36	2024-02-18	14:15	2024-02-18 14:15:00	Anser anser	49	14.25	22	winter cereals	0	1					2
37	2024-02-18	14:24	2024-02-18 14:24:00	Anser anser	49	14.4	83	grassland	2	0	Yes	2	0	Anser anser	80
37	2024-02-18	14:30	2024-02-18 14:30:00	Anser albifrons	49	14.5	83	grassland	0	1					3
38	2024-02-18	14:52	2024-02-18 14:52:00	Anser albifrons	49	14.8667	530	grassland	1	0	Yes	1	0	Anser albifrons	350
38	2024-02-18	14:53	2024-02-18 14:53:00	Anser anser	49	14.8833	530	grassland	1	0	Yes	1	0	Anser anser	30
38	2024-02-18	14:54	2024-02-18 14:54:00	Anser serrirostris	49	14.9	530	grassland	0	1					150
39	2024-02-18	15:18	2024-02-18 15:18:00	Anser albifrons	49	15.3	140	grassland	0	1					70
39	2024-02-18	15:19	2024-02-18 15:19:00	Anser serrirostris	49	15.3167	140	grassland	0	1					70
40	2024-02-21	09:16	2024-02-21 09:16:00	Anser serrirostris	52	9.26667	56	grassland	0	1					9
40	2024-02-21	09:17	2024-02-21 09:17:00	Anser anser	52	9.28333	56	grassland	1	0	Yes	1	0	Anser anser	47
41	2024-02-21	10:04	2024-02-21 10:04:00	Anser anser	52	10.0667	8	winter cereals	1	0	Yes	1	0	Anser anser	8
42	2024-02-21	10:15	2024-02-21 10:15:00	Anser anser	52	10.25	40	grassland	0	1					19
42	2024-02-21	10:16	2024-02-21 10:16:00	Anser albifrons	52	10.2667	40	grassland	0	1					3
42	2024-02-21	10:16	2024-02-21 10:16:00	Anser serrirostris	52	10.2667	40	grassland	0	1					18
43	2024-02-21	10:30	2024-02-21 10:30:00	Anser anser	52	10.5	10	grassland	0	1					10
44	2024-02-21	10:50	2024-02-21 10:50:00	Anser serrirostris	52	10.8333	331	grassland	0	1					300
44	2024-02-21	10:51	2024-02-21 10:51:00	Anser albifrons	52	10.85	331	grassland	0	1					30
45	2024-02-21	11:12	2024-02-21 11:12:00	Anser anser	52	11.2	17	grassland	1	0	Yes	1	0	Anser anser	17
46	2024-02-21	11:35	2024-02-21 11:35:00	Anser serrirostris	52	11.5833	65	grassland	0	1					10
46	2024-02-21	11:36	2024-02-21 11:36:00	Anser albifrons	52	11.6	65	grassland	0	1					5
46	2024-02-21	11:36	2024-02-21 11:36:00	Anser anser	52	11.6	65	grassland	1	0	No	0	1	Anser serrirostris	50
47	2024-02-21	11:50	2024-02-21 11:50:00	Anser anser	52	11.8333	7	winter cereals	0	1					7
48	2024-02-21	12:09	2024-02-21 12:09:00	Anser albifrons	52	12.15	995	grassland	1	0	Yes	1	0	Anser albifrons	750
48	2024-02-21	12:09	2024-02-21 12:09:00	Anser serrirostris	52	12.15	995	grassland	1	0	Yes	1	0	Anser serrirostris	220
48	2024-02-21	12:12	2024-02-21 12:12:00	Branta leucopsis	52	12.2	995	grassland	0	1					23
48	2024-02-21	12:30	2024-02-21 12:30:00	Anser anser	52	12.5	995	grassland	0	1					1
49	2024-02-21	13:07	2024-02-21 13:07:00	Anser albifrons	52	13.1167	307	winter cereals	1	0	Yes	1	0	Anser albifrons	300
49	2024-02-21	13:07	2024-02-21 13:07:00	Anser serrirostris	52	13.1167	307	winter cereals	0	1					5
49	2024-02-21	13:08	2024-02-21 13:08:00	Anser anser	52	13.1333	307	winter cereals	0	1					2
50	2024-02-21	13:20	2024-02-21 13:20:00	Anser anser	52	13.3333	35	grassland	4	0	Yes	4	0	Anser anser	35
51	2024-02-21	13:26	2024-02-21 13:26:00	Anser anser	52	13.4333	42	grassland	0	1					42
52	2024-02-21	13:41	2024-02-21 13:41:00	Anser anser	52	13.6833	14	grassland	3	0	Yes	3	0	Anser anser	14
53	2024-02-21	13:51	2024-02-21 13:51:00	Anser anser	52	13.85	85	grassland	0	1					25
53	2024-02-21	13:52	2024-02-21 13:52:00	Anser albifrons	52	13.8667	85	grassland	1	0	Yes	1	0	Anser albifrons	60
54	2024-02-21	14:03	2024-02-21 14:03:00	Anser anser	52	14.05	72	grassland	6	0	Yes	6	0	Anser anser	40
54	2024-02-21	14:03	2024-02-21 14:03:00	Anser serrirostris	52	14.05	72	grassland	1	0	Yes	1	0	Anser serrirostris	30
55	2024-02-21	14:24	2024-02-21 14:24:00	Anser albifrons	52	14.4	15	winter cereals	0	1					7
55	2024-02-21	14:24	2024-02-21 14:24:00	Anser anser	52	14.4	15	winter cereals	0	1					8
56	2024-02-22	09:13	2024-02-22 09:13:00	Anser albifrons	53	9.21667	427	winter cereals	0	1					420
56	2024-02-22	09:14	2024-02-22 09:14:00	Anser anser	53	9.23333	427	winter cereals	0	1					2
56	2024-02-22	09:14	2024-02-22 09:14:00	Anser serrirostris	53	9.23333	427	winter cereals	0	1					5
57	2024-02-22	09:31	2024-02-22 09:31:00	Anser albifrons	53	9.51667	608	winter cereals	2	0	Yes	2	0	Anser albifrons	600
57	2024-02-22	09:32	2024-02-22 09:32:00	Anser serrirostris	53	9.53333	608	winter cereals	0	1					4
57	2024-02-22	09:33	2024-02-22 09:33:00	Branta leucopsis	53	9.55	608	winter cereals	0	1					4
58	2024-02-22	09:58	2024-02-22 09:58:00	Anser albifrons	53	9.96667	274	grassland	0	1					240
58	2024-02-22	09:59	2024-02-22 09:59:00	Anser anser	53	9.98333	274	grassland	1	0	Yes	1	0	Anser anser	30
58	2024-02-22	09:59	2024-02-22 09:59:00	Anser serrirostris	53	9.98333	274	grassland	0	1					4
59	2024-02-22	10:08	2024-02-22 10:08:00	Anser anser	53	10.1333	95	grassland	1	0	Yes	1	0	Anser anser	95
60	2024-02-22	10:38	2024-02-22 10:38:00	Anser albifrons	53	10.6333	40	grassland	0	1					20
60	2024-02-22	10:39	2024-02-22 10:39:00	Anser anser	53	10.65	40	grassland	6	0	Yes	6	0	Anser anser	20
61	2024-02-22	10:47	2024-02-22 10:47:00	Anser anser	53	10.7833	35	grassland	1	0	Yes	1	0	Anser anser	35
62	2024-02-22	11:06	2024-02-22 11:06:00	Anser anser	53	11.1	901	grassland	6	0	Yes	6	0	Anser anser	50
62	2024-02-22	11:07	2024-02-22 11:07:00	Anser albifrons	53	11.1167	901	grassland	1	0	Yes	1	0	Anser albifrons	800
62	2024-02-22	11:08	2024-02-22 11:08:00	Anser serrirostris	53	11.1333	901	grassland	0	1					50
62	2024-02-22	11:08	2024-02-22 11:08:00	Branta leucopsis	53	11.1333	901	grassland	0	1					1
63	2024-02-22	11:55	2024-02-22 11:55:00	Anser albifrons	53	11.9167	162	grassland	1	0	Yes	1	0	Anser albifrons	150
63	2024-02-22	11:55	2024-02-22 11:55:00	Anser serrirostris	53	11.9167	162	grassland	0	1					10
63	2024-02-22	11:56	2024-02-22 11:56:00	Anser anser	53	11.9333	162	grassland	0	1					2
64	2024-02-22	12:08	2024-02-22 12:08:00	Anser anser	53	12.1333	64	grassland	2	0	Yes	2	0	Anser anser	62
65	2024-02-22	12:42	2024-02-22 12:42:00	Anser albifrons	53	12.7	125	grassland	1	0	Yes	1	0	Anser albifrons	20
65	2024-02-22	12:42	2024-02-22 12:42:00	Anser anser	53	12.7	125	grassland	0	1					85
65	2024-02-22	12:42	2024-02-22 12:42:00	Anser serrirostris	53	12.7	125	grassland	0	1					20
66	2024-02-22	13:02	2024-02-22 13:02:00	Anser serrirostris	53	13.0333	960	grassland	2	0	Yes	2	0	Anser serrirostris	100
66	2024-02-22	13:03	2024-02-22 13:03:00	Anser anser	53	13.05	960	grassland	0	1					10
66	2024-02-22	13:10	2024-02-22 13:10:00	Anser albifrons	53	13.1667	960	grassland	4	0	Yes	4	0	Anser albifrons	850
67	2024-02-22	13:24	2024-02-22 13:24:00	Anser albifrons	53	13.4	75	grassland	0	1					60
67	2024-02-22	13:24	2024-02-22 13:24:00	Anser anser	53	13.4	75	grassland	1	0	Yes	1	0	Anser anser	15
68	2024-02-22	13:41	2024-02-22 13:41:00	Anser albifrons	53	13.6833	1054	grassland	0	1					950
68	2024-02-22	13:42	2024-02-22 13:42:00	Branta leucopsis	53	13.7	1054	grassland	0	1					4
68	2024-02-22	13:43	2024-02-22 13:43:00	Anser serrirostris	53	13.7167	1054	grassland	0	1					100
69	2024-02-22	14:25	2024-02-22 14:25:00	Anser anser	53	14.4167	75	winter cereals	1	0	Yes	1	0	Anser anser	75
70	2024-02-22	14:51	2024-02-22 14:51:00	Branta leucopsis	53	14.85	1177	grassland	0	1					25
70	2024-02-22	14:52	2024-02-22 14:52:00	Anser albifrons	53	14.8667	1177	grassland	1	0	Yes	1	0	Anser albifrons	1000
70	2024-02-22	14:52	2024-02-22 14:52:00	Anser serrirostris	53	14.8667	1177	grassland	0	1					150
71	2024-02-22	15:29	2024-02-22 15:29:00	Anser albifrons	53	15.4833	1063	grassland	1	0	Yes	1	0	Anser albifrons	600
71	2024-02-22	15:29	2024-02-22 15:29:00	Anser serrirostris	53	15.4833	1063	grassland	0	1					200
71	2024-02-22	15:31	2024-02-22 15:31:00	Anser albifrons	53	15.5167	1063	winter cereals	0	1					250
71	2024-02-22	15:31	2024-02-22 15:31:00	Anser serrirostris	53	15.5167	1063	winter cereals	0	1					10
72	2024-02-27	08:54	2024-02-27 08:54:00	Anser albifrons	58	8.9	1602	grassland	1	0	Yes	1	0	Anser albifrons	1550
72	2024-02-27	08:55	2024-02-27 08:55:00	Anser serrirostris	58	8.91667	1602	grassland	0	1					50
72	2024-02-27	08:55	2024-02-27 08:55:00	Branta leucopsis	58	8.91667	1602	grassland	0	1					2
73	2024-02-27	09:08	2024-02-27 09:08:00	Anser albifrons	58	9.13333	1530	other	0	1					80
73	2024-02-27	09:08	2024-02-27 09:08:00	Anser albifrons	58	9.13333	1530	winter cereals	0	1					250
73	2024-02-27	09:16	2024-02-27 09:16:00	Anser albifrons	58	9.26667	1530	grassland	3	0	Yes	3	0	Anser albifrons	1200
74	2024-02-27	09:46	2024-02-27 09:46:00	Anser albifrons	58	9.76667	6011	grassland	3	0	Yes	3	0	Anser albifrons	6000
74	2024-02-27	09:48	2024-02-27 09:48:00	Branta leucopsis	58	9.8	6011	grassland	0	1					10
75	2024-02-27	12:20	2024-02-27 12:20:00	Anser anser	58	12.3333	39	grassland	1	0	Yes	1	0	Anser anser	30
75	2024-02-27	12:21	2024-02-27 12:21:00	Anser serrirostris	58	12.35	39	grassland	0	1					9
76	2024-02-27	14:30	2024-02-27 14:30:00	Anser anser	58	14.5	59	grassland	1	0	Yes	1	0	Anser anser	31
76	2024-02-27	14:31	2024-02-27 14:31:00	Anser albifrons	58	14.5167	59	grassland	0	1					28
77	2024-02-27	15:06	2024-02-27 15:06:00	Anser albifrons	58	15.1	403	grassland	0	1					400
77	2024-02-27	15:06	2024-02-27 15:06:00	Anser serrirostris	58	15.1	403	grassland	0	1					1
77	2024-02-27	15:06	2024-02-27 15:06:00	Branta leucopsis	58	15.1	403	grassland	0	1					2
78	2024-02-27	15:23	2024-02-27 15:23:00	Anser albifrons	58	15.3833	2011	grassland	1	0	No	0	1	Branta leucopsis	1000
78	2024-02-27	15:23	2024-02-27 15:23:00	Branta leucopsis	58	15.3833	2011	grassland	1	0	No	0	1	Anser albifrons	1000
78	2024-02-27	15:24	2024-02-27 15:24:00	Anser serrirostris	58	15.4	2011	grassland	0	1					10
79	2024-02-27	15:33	2024-02-27 15:33:00	Branta leucopsis	58	15.55	456	grassland	0	1					4
79	2024-02-27	15:34	2024-02-27 15:34:00	Anser albifrons	58	15.5667	456	grassland	2	0	Yes	2	0	Anser albifrons	450
79	2024-02-27	15:34	2024-02-27 15:34:00	Anser anser	58	15.5667	456	grassland	0	1					2
80	2024-02-27	16:32	2024-02-27 16:32:00	Anser albifrons	58	16.5333	300	grassland	0	1					300
81	2024-02-28	08:47	2024-02-28 08:47:00	Anser anser	59	8.78333	25	grassland	1	0	Yes	1	0	Anser anser	18
81	2024-02-28	08:48	2024-02-28 08:48:00	Anser albifrons	59	8.8	25	grassland	0	1					4
82	2024-02-28	09:01	2024-02-28 09:01:00	Anser anser	59	9.01667	252	grassland	0	1					2
82	2024-02-28	09:02	2024-02-28 09:02:00	Anser albifrons	59	9.03333	252	grassland	1	0	Yes	1	0	Anser albifrons	250
83	2024-02-28	09:17	2024-02-28 09:17:00	Anser albifrons	59	9.28333	38	grassland	0	1					38
84	2024-02-28	09:40	2024-02-28 09:40:00	Anser anser	59	9.66667	242	grassland	0	1					2
84	2024-02-28	09:41	2024-02-28 09:41:00	Anser albifrons	59	9.68333	242	grassland	1	0	Yes	1	0	Anser albifrons	240
85	2024-02-28	09:52	2024-02-28 09:52:00	Anser anser	59	9.86667	26	other	0	1					11
85	2024-02-28	09:53	2024-02-28 09:53:00	Anser anser	59	9.88333	26	other	0	1					15
86	2024-02-28	10:22	2024-02-28 10:22:00	Anser anser	59	10.3667	14	grassland	1	0	Yes	1	0	Anser anser	14
87	2024-02-28	10:30	2024-02-28 10:30:00	Anser anser	59	10.5	16	grassland	0	1					16
88	2024-02-28	10:47	2024-02-28 10:47:00	Anser albifrons	59	10.7833	322	grassland	1	0	Yes	1	0	Anser albifrons	300
88	2024-02-28	10:47	2024-02-28 10:47:00	Branta leucopsis	59	10.7833	322	grassland	0	1					12
88	2024-02-28	10:48	2024-02-28 10:48:00	Anser anser	59	10.8	322	grassland	0	1					10
89	2024-02-28	11:12	2024-02-28 11:12:00	Anser albifrons	59	11.2	48	grassland	1	0	Yes	1	0	Anser albifrons	45
89	2024-02-28	11:14	2024-02-28 11:14:00	Anser anser	59	11.2333	48	grassland	0	1					2
90	2024-02-28	12:12	2024-02-28 12:12:00	Anser albifrons	59	12.2	542	grassland	1	0	Yes	1	0	Anser albifrons	510
90	2024-02-28	12:13	2024-02-28 12:13:00	Anser anser	59	12.2167	542	grassland	1	0	Yes	1	0	Anser anser	31
90	2024-02-28	12:13	2024-02-28 12:13:00	Anser serrirostris	59	12.2167	542	grassland	0	1					1
91	2024-02-28	12:28	2024-02-28 12:28:00	Anser albifrons	59	12.4667	67	grassland	0	1					40
91	2024-02-28	12:28	2024-02-28 12:28:00	Anser anser	59	12.4667	67	grassland	0	1					25
91	2024-02-28	12:29	2024-02-28 12:29:00	Anser serrirostris	59	12.4833	67	grassland	0	1					2
92	2024-02-28	12:38	2024-02-28 12:38:00	Anser albifrons	59	12.6333	52	grassland	0	1					5
92	2024-02-28	12:38	2024-02-28 12:38:00	Anser anser	59	12.6333	52	grassland	2	0	Yes	2	0	Anser anser	47
93	2024-02-28	13:06	2024-02-28 13:06:00	Anser anser	59	13.1	14	grassland	2	0	Yes	2	0	Anser anser	14
94	2024-02-28	13:17	2024-02-28 13:17:00	Anser anser	59	13.2833	48	grassland	0	1					48
95	2024-02-28	13:25	2024-02-28 13:25:00	Anser anser	59	13.4167	96	grassland	0	1					84
95	2024-02-28	13:26	2024-02-28 13:26:00	Anser albifrons	59	13.4333	96	grassland	0	1					4
95	2024-02-28	13:27	2024-02-28 13:27:00	Anser serrirostris	59	13.45	96	grassland	0	1					8
96	2024-02-28	13:53	2024-02-28 13:53:00	Anser serrirostris	59	13.8833	401	winter cereals	0	1					150
96	2024-02-28	13:54	2024-02-28 13:54:00	Anser albifrons	59	13.9	401	winter cereals	0	1					250
97	2024-02-28	14:15	2024-02-28 14:15:00	Anser albifrons	59	14.25	280	grassland	1	0	No	0	1	Anser serrirostris	270
97	2024-02-28	14:15	2024-02-28 14:15:00	Anser serrirostris	59	14.25	280	grassland	0	1					10
98	2024-02-29	08:13	2024-02-29 08:13:00	Anser albifrons	60	8.21667	140	other	1	0	Yes	1	0	Anser albifrons	50
98	2024-02-29	08:14	2024-02-29 08:14:00	Anser albifrons	60	8.23333	140	other	1	0	No	0	1	Anser serrirostris	90
99	2024-02-29	09:12	2024-02-29 09:12:00	Anser albifrons	60	9.2	3215	grassland	2	0	Yes	2	0	Anser albifrons	2900
99	2024-02-29	09:12	2024-02-29 09:12:00	Branta leucopsis	60	9.2	3215	grassland	0	1					1
99	2024-02-29	09:18	2024-02-29 09:18:00	Anser anser	60	9.3	3215	grassland	0	1					10
99	2024-02-29	09:19	2024-02-29 09:19:00	Anser serrirostris	60	9.31667	3215	grassland	1	0	Yes	1	0	Anser serrirostris	300
100	2024-02-29	10:44	2024-02-29 10:44:00	Anser serrirostris	60	10.7333	18	winter cereals	0	1					18
101	2024-02-29	10:58	2024-02-29 10:58:00	Anser serrirostris	60	10.9667	87	other	2	0	Yes	2	0	Anser serrirostris	45
101	2024-02-29	11:00	2024-02-29 11:00:00	Anser albifrons	60	11	87	winter cereals	2	0	Yes	2	0	Anser albifrons	40
101	2024-02-29	11:00	2024-02-29 11:00:00	Anser anser	60	11	87	other	0	1					1
102	2024-02-29	11:47	2024-02-29 11:47:00	Anser anser	60	11.7833	46	grassland	0	1					29
102	2024-02-29	11:49	2024-02-29 11:49:00	Anser albifrons	60	11.8167	46	grassland	0	1					15
103	2024-02-29	12:02	2024-02-29 12:02:00	Anser anser	60	12.0333	60	grassland	1	0	Yes	1	0	Anser anser	60
104	2024-02-29	12:17	2024-02-29 12:17:00	Branta leucopsis	60	12.2833	414	grassland	1	0	Yes	1	0	Branta leucopsis	12
104	2024-02-29	12:19	2024-02-29 12:19:00	Anser albifrons	60	12.3167	414	grassland	2	0	Yes	2	0	Anser albifrons	400
104	2024-02-29	12:19	2024-02-29 12:19:00	Anser anser	60	12.3167	414	grassland	0	1					2
105	2024-02-29	12:31	2024-02-29 12:31:00	Anser anser	60	12.5167	22	grassland	0	1					22
106	2024-02-29	12:46	2024-02-29 12:46:00	Anser anser	60	12.7667	50	grassland	6	0	Yes	6	0	Anser anser	50
107	2024-03-05	08:44	2024-03-05 08:44:00	Anser albifrons	65	8.73333	825	grassland	3	0	Yes	3	0	Anser albifrons	810
107	2024-03-05	08:45	2024-03-05 08:45:00	Anser anser	65	8.75	825	grassland	0	1					15
108	2024-03-05	09:03	2024-03-05 09:03:00	Anser albifrons	65	9.05	100	grassland	2	0	Yes	2	0	Anser albifrons	100
109	2024-03-05	09:20	2024-03-05 09:20:00	Anser anser	65	9.33333	16	grassland	1	0	Yes	1	0	Anser anser	10
109	2024-03-05	09:21	2024-03-05 09:21:00	Anser anser	65	9.35	16	other	0	1					6
110	2024-03-05	10:22	2024-03-05 10:22:00	Anser serrirostris	65	10.3667	10	winter cereals	0	1					10
111	2024-03-05	10:37	2024-03-05 10:37:00	Anser serrirostris	65	10.6167	40	grassland	0	1					34
111	2024-03-05	10:38	2024-03-05 10:38:00	Anser anser	65	10.6333	40	grassland	0	1					5
112	2024-03-05	10:55	2024-03-05 10:55:00	Anser albifrons	65	10.9167	200	grassland	1	0	Yes	1	0	Anser albifrons	180
112	2024-03-05	10:56	2024-03-05 10:56:00	Anser anser	65	10.9333	200	grassland	0	1					20
113	2024-03-05	11:25	2024-03-05 11:25:00	Anser albifrons	65	11.4167	40	grassland	1	0	Yes	1	0	Anser albifrons	24
113	2024-03-05	11:26	2024-03-05 11:26:00	Anser anser	65	11.4333	40	grassland	1	0	No	0	1	Anser albifrons	16
114	2024-03-05	12:16	2024-03-05 12:16:00	Anser albifrons	65	12.2667	3339	grassland	5	0	Yes	5	0	Anser albifrons	3300
114	2024-03-05	12:16	2024-03-05 12:16:00	Anser anser	65	12.2667	3339	grassland	0	1					10
114	2024-03-05	12:16	2024-03-05 12:16:00	Branta leucopsis	65	12.2667	3339	grassland	1	0	Yes	1	0	Branta leucopsis	28
114	2024-03-05	12:40	2024-03-05 12:40:00	Anser serrirostris	65	12.6667	3339	grassland	0	1					1
115	2024-03-05	13:04	2024-03-05 13:04:00	Anser albifrons	65	13.0667	161	grassland	1	0	Yes	1	0	Anser albifrons	120
115	2024-03-05	13:05	2024-03-05 13:05:00	Anser anser	65	13.0833	161	grassland	1	0	Yes	1	0	Anser anser	40
115	2024-03-05	13:05	2024-03-05 13:05:00	Anser serrirostris	65	13.0833	161	grassland	0	1					1
116	2024-03-05	14:12	2024-03-05 14:12:00	Anser albifrons	65	14.2	150	winter cereals	1	0	Yes	1	0	Anser albifrons	110
116	2024-03-05	14:12	2024-03-05 14:12:00	Anser anser	65	14.2	150	winter cereals	0	1					25
116	2024-03-05	14:13	2024-03-05 14:13:00	Anser albifrons	65	14.2167	150	other	0	1					10
116	2024-03-05	14:13	2024-03-05 14:13:00	Anser anser	65	14.2167	150	other	0	1					5
117	2024-03-05	14:25	2024-03-05 14:25:00	Anser albifrons	65	14.4167	464	grassland	1	0	Yes	1	0	Anser albifrons	460
117	2024-03-05	14:26	2024-03-05 14:26:00	Anser anser	65	14.4333	464	grassland	0	1					4
118	2024-03-05	16:02	2024-03-05 16:02:00	Anser albifrons	65	16.0333	200	grassland	4	0	Yes	4	0	Anser albifrons	200
119	2024-03-05	16:11	2024-03-05 16:11:00	Anser anser	65	16.1833	30	grassland	1	0	Yes	1	0	Anser anser	30
120	2024-03-05	16:23	2024-03-05 16:23:00	Anser anser	65	16.3833	70	grassland	0	1					65
120	2024-03-05	16:24	2024-03-05 16:24:00	Anser albifrons	65	16.4	70	grassland	0	1					5
121	2024-03-05	16:34	2024-03-05 16:34:00	Anser anser	65	16.5667	45	grassland	6	0	Yes	6	0	Anser anser	45
122	2024-03-05	16:42	2024-03-05 16:42:00	Anser albifrons	65	16.7	377	grassland	4	0	Yes	4	0	Anser albifrons	370
122	2024-03-05	16:42	2024-03-05 16:42:00	Anser anser	65	16.7	377	grassland	0	1					7
123	2024-03-05	17:14	2024-03-05 17:14:00	Anser serrirostris	65	17.2333	725	winter cereals	0	1					100
123	2024-03-05	17:15	2024-03-05 17:15:00	Anser albifrons	65	17.25	725	grassland	1	0	Yes	1	0	Anser albifrons	350
123	2024-03-05	17:15	2024-03-05 17:15:00	Anser albifrons	65	17.25	725	winter cereals	2	0	Yes	2	0	Anser albifrons	200
123	2024-03-05	17:16	2024-03-05 17:16:00	Anser serrirostris	65	17.2667	725	grassland	0	1					70
123	2024-03-05	17:16	2024-03-05 17:16:00	Branta leucopsis	65	17.2667	725	grassland	1	0	Yes	1	0	Branta leucopsis	5
124	2024-03-06	09:34	2024-03-06 09:34:00	Anser serrirostris	66	9.56667	85	winter cereals	1	0	Yes	1	0	Anser serrirostris	80
124	2024-03-06	09:35	2024-03-06 09:35:00	Anser albifrons	66	9.58333	85	winter cereals	0	1					5
125	2024-03-06	10:34	2024-03-06 10:34:00	Anser albifrons	66	10.5667	800	winter cereals	3	0	Yes	3	0	Anser albifrons	650
125	2024-03-06	10:36	2024-03-06 10:36:00	Anser serrirostris	66	10.6	800	winter cereals	1	0	Yes	1	0	Anser serrirostris	150
126	2024-03-06	11:08	2024-03-06 11:08:00	Anser albifrons	66	11.1333	1068	grassland	4	0	Yes	4	0	Anser albifrons	1000
126	2024-03-06	11:08	2024-03-06 11:08:00	Anser serrirostris	66	11.1333	1068	grassland	0	1					50
126	2024-03-06	11:08	2024-03-06 11:08:00	Branta leucopsis	66	11.1333	1068	grassland	2	0	Yes	2	0	Branta leucopsis	18
127	2024-03-06	11:31	2024-03-06 11:31:00	Anser anser	66	11.5167	23	grassland	1	0	Yes	1	0	Anser anser	23
128	2024-03-06	11:57	2024-03-06 11:57:00	Anser anser	66	11.95	7	grassland	0	1					7
129	2024-03-06	11:58	2024-03-06 11:58:00	Anser anser	66	11.9667	16	grassland	0	1					16
130	2024-03-06	11:58	2024-03-06 11:58:00	Anser anser	66	11.9667	11	grassland	0	1					11
131	2024-03-06	11:58	2024-03-06 11:58:00	Anser anser	66	11.9667	11	grassland	0	1					11
132	2024-03-06	12:39	2024-03-06 12:39:00	Anser anser	66	12.65	17	grassland	4	0	Yes	4	0	Anser anser	17
133	2024-03-06	12:50	2024-03-06 12:50:00	Anser anser	66	12.8333	35	grassland	1	0	Yes	1	0	Anser anser	35
134	2024-03-06	13:01	2024-03-06 13:01:00	Anser anser	66	13.0167	26	grassland	2	0	Yes	2	0	Anser anser	25
134	2024-03-06	13:02	2024-03-06 13:02:00	Anser albifrons	66	13.0333	26	grassland	0	1					1
135	2024-03-06	13:30	2024-03-06 13:30:00	Anser anser	66	13.5	28	grassland	1	0	Yes	1	0	Anser anser	28
136	2024-03-06	14:50	2024-03-06 14:50:00	Anser albifrons	66	14.8333	2220	grassland	4	0	Yes	4	0	Anser albifrons	2100
136	2024-03-06	14:50	2024-03-06 14:50:00	Anser anser	66	14.8333	2220	grassland	0	1					10
136	2024-03-06	14:50	2024-03-06 14:50:00	Branta leucopsis	66	14.8333	2220	grassland	1	0	Yes	1	0	Branta leucopsis	10
136	2024-03-06	14:51	2024-03-06 14:51:00	Anser serrirostris	66	14.85	2220	grassland	0	1					100
137	2024-03-06	15:14	2024-03-06 15:14:00	Anser albifrons	66	15.2333	705	grassland	1	0	Yes	1	0	Anser albifrons	700
137	2024-03-06	15:15	2024-03-06 15:15:00	Anser serrirostris	66	15.25	705	grassland	0	1					5
138	2024-03-06	15:35	2024-03-06 15:35:00	Anser albifrons	66	15.5833	560	grassland	1	0	Yes	1	0	Anser albifrons	460
138	2024-03-06	15:36	2024-03-06 15:36:00	Anser serrirostris	66	15.6	560	grassland	0	1					100
139	2024-03-06	16:04	2024-03-06 16:04:00	Anser albifrons	66	16.0667	1646	grassland	2	0	Yes	2	0	Anser albifrons	1600
139	2024-03-06	16:05	2024-03-06 16:05:00	Anser anser	66	16.0833	1646	grassland	0	1					10
139	2024-03-06	16:05	2024-03-06 16:05:00	Anser serrirostris	66	16.0833	1646	grassland	0	1					30
139	2024-03-06	16:05	2024-03-06 16:05:00	Branta leucopsis	66	16.0833	1646	grassland	0	1					6
140	2024-03-06	16:25	2024-03-06 16:25:00	Anser anser	66	16.4167	12	winter cereals	2	0	Yes	2	0	Anser anser	12
141	2024-03-06	16:46	2024-03-06 16:46:00	Anser albifrons	66	16.7667	1251	winter cereals	3	0	Yes	3	0	Anser albifrons	650
141	2024-03-06	16:47	2024-03-06 16:47:00	Anser serrirostris	66	16.7833	1251	winter cereals	3	0	Yes	3	0	Anser serrirostris	600
142	2024-03-07	09:17	2024-03-07 09:17:00	Anser albifrons	67	9.28333	331	grassland	1	0	No	0	1	Anser serrirostris	220
142	2024-03-07	09:17	2024-03-07 09:17:00	Anser serrirostris	67	9.28333	331	grassland	1	0	Yes	1	0	Anser serrirostris	220
142	2024-03-07	09:19	2024-03-07 09:19:00	Anser albifrons	67	9.31667	331	grassland	1	0	Yes	1	0	Anser albifrons	110
143	2024-03-07	12:20	2024-03-07 12:20:00	Anser albifrons	67	12.3333	686	grassland	2	0	Yes	2	0	Anser albifrons	680
143	2024-03-07	12:20	2024-03-07 12:20:00	Branta leucopsis	67	12.3333	686	grassland	0	1					6
144	2024-03-07	13:19	2024-03-07 13:19:00	Anser albifrons	67	13.3167	1001	grassland	5	0	Yes	5	0	Anser albifrons	1000
144	2024-03-07	13:19	2024-03-07 13:19:00	Anser serrirostris	67	13.3167	1001	grassland	0	1					1
145	2024-03-07	13:20	2024-03-07 13:20:00	Anser anser	67	13.3333	10	grassland	0	1					10
146	2024-03-07	14:10	2024-03-07 14:10:00	Anser albifrons	67	14.1667	48	grassland	0	1					15
146	2024-03-07	14:10	2024-03-07 14:10:00	Anser anser	67	14.1667	48	grassland	3	0	Yes	3	0	Anser anser	33
147	2024-03-07	14:55	2024-03-07 14:55:00	Anser anser	67	14.9167	75	winter cereals	2	0	Yes	2	0	Anser anser	75
148	2024-03-07	15:44	2024-03-07 15:44:00	Anser albifrons	67	15.7333	922	grassland	2	0	Yes	2	0	Anser albifrons	900
148	2024-03-07	15:44	2024-03-07 15:44:00	Branta leucopsis	67	15.7333	922	grassland	0	1					10
148	2024-03-07	15:45	2024-03-07 15:45:00	Anser anser	67	15.75	922	grassland	1	0	Yes	1	0	Anser anser	10
148	2024-03-07	15:45	2024-03-07 15:45:00	Anser serrirostris	67	15.75	922	grassland	0	1					1
149	2024-03-07	16:11	2024-03-07 16:11:00	Anser anser	67	16.1833	20	grassland	0	1					14
149	2024-03-07	16:12	2024-03-07 16:12:00	Anser serrirostris	67	16.2	20	grassland	0	1					6
150	2024-03-07	16:22	2024-03-07 16:22:00	Anser anser	67	16.3667	31	grassland	5	0	Yes	5	0	Anser anser	31
151	2024-03-07	16:32	2024-03-07 16:32:00	Anser anser	67	16.5333	21	grassland	5	0	Yes	5	0	Anser anser	21
152	2024-03-07	16:55	2024-03-07 16:55:00	Anser albifrons	67	16.9167	2102	grassland	2	0	Yes	2	0	Anser albifrons	800
152	2024-03-07	16:55	2024-03-07 16:55:00	Anser serrirostris	67	16.9167	2102	grassland	3	0	Yes	3	0	Anser serrirostris	1300
153	2024-03-12	09:39	2024-03-12 09:39:00	Anser serrirostris	72	9.65	700	grassland	4	0	Yes	4	0	Anser serrirostris	500
153	2024-03-12	09:40	2024-03-12 09:40:00	Anser albifrons	72	9.66667	700	grassland	1	0	No	0	1	Anser serrirostris	100
153	2024-03-12	09:40	2024-03-12 09:40:00	Anser albifrons	72	9.66667	700	grassland	1	0	Yes	1	0	Anser albifrons	100
154	2024-03-12	09:55	2024-03-12 09:55:00	Anser albifrons	72	9.91667	653	grassland	3	0	Yes	3	0	Anser albifrons	450
154	2024-03-12	09:55	2024-03-12 09:55:00	Anser serrirostris	72	9.91667	653	grassland	0	1					200
154	2024-03-12	10:06	2024-03-12 10:06:00	Branta leucopsis	72	10.1	653	grassland	0	1					2
155	2024-03-12	10:21	2024-03-12 10:21:00	Anser albifrons	72	10.35	185	grassland	0	1					40
155	2024-03-12	10:22	2024-03-12 10:22:00	Anser serrirostris	72	10.3667	185	other	0	1					10
155	2024-03-12	10:22	2024-03-12 10:22:00	Anser serrirostris	72	10.3667	185	grassland	1	0	Yes	1	0	Anser serrirostris	120
156	2024-03-12	10:55	2024-03-12 10:55:00	Anser albifrons	72	10.9167	350	grassland	2	0	Yes	2	0	Anser albifrons	350
157	2024-03-12	11:05	2024-03-12 11:05:00	Anser anser	72	11.0833	46	winter cereals	2	0	Yes	2	0	Anser anser	19
157	2024-03-12	11:05	2024-03-12 11:05:00	Anser anser	72	11.0833	46	grassland	0	1					27
158	2024-03-12	11:39	2024-03-12 11:39:00	Anser albifrons	72	11.65	661	grassland	1	0	Yes	1	0	Anser albifrons	650
158	2024-03-12	11:40	2024-03-12 11:40:00	Branta leucopsis	72	11.6667	661	grassland	1	0	Yes	1	0	Branta leucopsis	9
159	2024-03-12	12:15	2024-03-12 12:15:00	Anser anser	72	12.25	590	grassland	0	1					20
159	2024-03-12	12:15	2024-03-12 12:15:00	Anser serrirostris	72	12.25	590	grassland	0	1					20
159	2024-03-12	12:16	2024-03-12 12:16:00	Anser albifrons	72	12.2667	590	grassland	1	0	Yes	1	0	Anser albifrons	550
160	2024-03-12	12:42	2024-03-12 12:42:00	Anser anser	72	12.7	56	grassland	1	0	Yes	1	0	Anser anser	32
160	2024-03-12	12:42	2024-03-12 12:42:00	Branta leucopsis	72	12.7	56	grassland	1	0	Yes	1	0	Branta leucopsis	4
160	2024-03-12	12:43	2024-03-12 12:43:00	Anser albifrons	72	12.7167	56	grassland	1	0	Yes	1	0	Anser albifrons	20
161	2024-03-12	12:54	2024-03-12 12:54:00	Anser anser	72	12.9	33	grassland	1	0	Yes	1	0	Anser anser	29
161	2024-03-12	12:55	2024-03-12 12:55:00	Anser albifrons	72	12.9167	33	grassland	0	1					4
162	2024-03-12	13:17	2024-03-12 13:17:00	Anser anser	72	13.2833	27	grassland	3	0	Yes	3	0	Anser anser	26
162	2024-03-12	13:18	2024-03-12 13:18:00	Anser albifrons	72	13.3	27	grassland	0	1					1
163	2024-03-12	13:33	2024-03-12 13:33:00	Anser albifrons	72	13.55	702	grassland	4	0	Yes	4	0	Anser albifrons	700
163	2024-03-12	13:34	2024-03-12 13:34:00	Branta leucopsis	72	13.5667	702	grassland	0	1					2
164	2024-03-12	13:46	2024-03-12 13:46:00	Anser albifrons	72	13.7667	601	grassland	3	0	Yes	3	0	Anser albifrons	600
165	2024-03-12	14:50	2024-03-12 14:50:00	Anser albifrons	72	14.8333	61	grassland	2	0	Yes	2	0	Anser albifrons	49
165	2024-03-12	14:51	2024-03-12 14:51:00	Anser anser	72	14.85	61	grassland	1	0	Yes	1	0	Anser anser	8
165	2024-03-12	14:51	2024-03-12 14:51:00	Branta leucopsis	72	14.85	61	grassland	0	1					4
166	2024-03-12	15:00	2024-03-12 15:00:00	Anser albifrons	72	15	22	grassland	0	1					13
166	2024-03-12	15:01	2024-03-12 15:01:00	Anser anser	72	15.0167	22	grassland	1	0	Yes	1	0	Anser anser	9
167	2024-03-12	15:10	2024-03-12 15:10:00	Anser anser	72	15.1667	24	grassland	0	1					24
168	2024-03-12	15:27	2024-03-12 15:27:00	Anser albifrons	72	15.45	220	grassland	3	0	Yes	3	0	Anser albifrons	220
169	2024-03-12	15:40	2024-03-12 15:40:00	Anser albifrons	72	15.6667	490	winter cereals	3	0	Yes	3	0	Anser albifrons	270
169	2024-03-12	15:41	2024-03-12 15:41:00	Anser serrirostris	72	15.6833	490	winter cereals	2	0	Yes	2	0	Anser serrirostris	220
170	2024-03-12	15:50	2024-03-12 15:50:00	Anser albifrons	72	15.8333	411	winter cereals	1	0	Yes	1	0	Anser albifrons	400
170	2024-03-12	15:50	2024-03-12 15:50:00	Anser serrirostris	72	15.8333	411	winter cereals	0	1					10
171	2024-03-13	10:29	2024-03-13 10:29:00	Anser albifrons	73	10.4833	271	grassland	1	0	No	0	1	Anser serrirostris	110
171	2024-03-13	10:29	2024-03-13 10:29:00	Anser serrirostris	73	10.4833	271	grassland	1	0	Yes	1	0	Anser serrirostris	110
171	2024-03-13	10:31	2024-03-13 10:31:00	Anser albifrons	73	10.5167	271	grassland	1	0	Yes	1	0	Anser albifrons	50
172	2024-03-13	10:59	2024-03-13 10:59:00	Anser albifrons	73	10.9833	906	grassland	2	0	Yes	2	0	Anser albifrons	900
172	2024-03-13	10:59	2024-03-13 10:59:00	Branta leucopsis	73	10.9833	906	grassland	0	1					6
173	2024-03-13	11:15	2024-03-13 11:15:00	Anser albifrons	73	11.25	1100	grassland	4	0	Yes	4	0	Anser albifrons	1100
174	2024-03-13	12:36	2024-03-13 12:36:00	Anser albifrons	73	12.6	1001	grassland	4	0	Yes	4	0	Anser albifrons	1000
175	2024-03-13	13:31	2024-03-13 13:31:00	Anser albifrons	73	13.5167	1652	grassland	1	0	Yes	1	0	Anser albifrons	1650
175	2024-03-13	13:31	2024-03-13 13:31:00	Branta leucopsis	73	13.5167	1652	grassland	0	1					2
176	2024-03-13	13:56	2024-03-13 13:56:00	Anser albifrons	73	13.9333	528	winter cereals	1	0	Yes	1	0	Anser albifrons	500
176	2024-03-13	13:56	2024-03-13 13:56:00	Branta leucopsis	73	13.9333	528	winter cereals	0	1					16
176	2024-03-13	13:57	2024-03-13 13:57:00	Anser anser	73	13.95	528	winter cereals	0	1					2
176	2024-03-13	13:57	2024-03-13 13:57:00	Anser serrirostris	73	13.95	528	winter cereals	0	1					10
177	2024-03-13	14:50	2024-03-13 14:50:00	Anser anser	73	14.8333	19	grassland	2	0	Yes	2	0	Anser anser	15
177	2024-03-13	14:51	2024-03-13 14:51:00	Anser albifrons	73	14.85	19	grassland	0	1					4
178	2024-03-13	15:07	2024-03-13 15:07:00	Anser anser	73	15.1167	49	grassland	2	0	Yes	2	0	Anser anser	42
178	2024-03-13	15:08	2024-03-13 15:08:00	Anser albifrons	73	15.1333	49	grassland	0	1					7
179	2024-03-13	15:15	2024-03-13 15:15:00	Anser anser	73	15.25	38	grassland	1	0	Yes	1	0	Anser anser	22
179	2024-03-13	15:16	2024-03-13 15:16:00	Anser albifrons	73	15.2667	38	grassland	0	1					12
179	2024-03-13	15:16	2024-03-13 15:16:00	Branta leucopsis	73	15.2667	38	grassland	1	0	Yes	1	0	Branta leucopsis	4
180	2024-03-13	15:36	2024-03-13 15:36:00	Anser anser	73	15.6	18	grassland	2	0	Yes	2	0	Anser anser	8
180	2024-03-13	15:37	2024-03-13 15:37:00	Anser albifrons	73	15.6167	18	grassland	0	1					10
181	2024-03-13	15:45	2024-03-13 15:45:00	Anser anser	73	15.75	17	grassland	0	1					16
181	2024-03-13	15:46	2024-03-13 15:46:00	Anser albifrons	73	15.7667	17	grassland	0	1					1
182	2024-03-13	15:57	2024-03-13 15:57:00	Anser albifrons	73	15.95	922	winter cereals	0	1					810
182	2024-03-13	15:58	2024-03-13 15:58:00	Anser albifrons	73	15.9667	922	winter cereals	1	0	Yes	1	0	Anser albifrons	70
182	2024-03-13	15:58	2024-03-13 15:58:00	Branta leucopsis	73	15.9667	922	winter cereals	0	1					7
182	2024-03-13	15:58	2024-03-13 15:58:00	Branta leucopsis	73	15.9667	922	winter cereals	0	1					35
183	2024-03-13	16:15	2024-03-13 16:15:00	Anser albifrons	73	16.25	3005	winter cereals	8	0	Yes	8	0	Anser albifrons	3000
183	2024-03-13	16:16	2024-03-13 16:16:00	Anser anser	73	16.2667	3005	winter cereals	0	1					2
183	2024-03-13	16:16	2024-03-13 16:16:00	Branta leucopsis	73	16.2667	3005	winter cereals	0	1					2
184	2024-03-13	16:24	2024-03-13 16:24:00	Anser albifrons	73	16.4	260	grassland	0	1					260
185	2024-03-13	16:38	2024-03-13 16:38:00	Anser albifrons	73	16.6333	60	winter cereals	0	1					40
185	2024-03-13	16:38	2024-03-13 16:38:00	Anser anser	73	16.6333	60	winter cereals	1	0	Yes	1	0	Anser anser	17
185	2024-03-13	16:39	2024-03-13 16:39:00	Anser anser	73	16.65	60	grassland	0	1					3
186	2024-03-14	08:20	2024-03-14 08:20:00	Anser albifrons	74	8.33333	19	grassland	0	1					5
186	2024-03-14	08:20	2024-03-14 08:20:00	Anser anser	74	8.33333	19	grassland	1	0	No	0	1	Anser albifrons	7
186	2024-03-14	08:20	2024-03-14 08:20:00	Anser anser	74	8.33333	19	grassland	1	0	Yes	1	0	Anser anser	7
187	2024-03-14	09:03	2024-03-14 09:03:00	Anser anser	74	9.05	13	grassland	3	0	Yes	3	0	Anser anser	13
188	2024-03-14	09:58	2024-03-14 09:58:00	Anser albifrons	74	9.96667	521	grassland	2	0	Yes	2	0	Anser albifrons	450
188	2024-03-14	10:00	2024-03-14 10:00:00	Anser serrirostris	74	10	521	grassland	0	1					70
189	2024-03-14	11:07	2024-03-14 11:07:00	Branta leucopsis	74	11.1167	2717	grassland	0	1					16
189	2024-03-14	11:08	2024-03-14 11:08:00	Anser albifrons	74	11.1333	2717	grassland	3	0	Yes	3	0	Anser albifrons	2500
189	2024-03-14	11:08	2024-03-14 11:08:00	Anser serrirostris	74	11.1333	2717	grassland	0	1					200
190	2024-03-14	12:08	2024-03-14 12:08:00	Anser anser	74	12.1333	18	grassland	1	0	Yes	1	0	Anser anser	14
190	2024-03-14	12:09	2024-03-14 12:09:00	Anser serrirostris	74	12.15	18	grassland	0	1					4
191	2024-03-14	12:57	2024-03-14 12:57:00	Anser albifrons	74	12.95	1075	grassland	1	0	Yes	1	0	Anser albifrons	1050
191	2024-03-14	12:57	2024-03-14 12:57:00	Branta leucopsis	74	12.95	1075	grassland	2	0	Yes	2	0	Branta leucopsis	25
192	2024-03-14	13:27	2024-03-14 13:27:00	Anser albifrons	74	13.45	659	grassland	2	0	Yes	2	0	Anser albifrons	650
192	2024-03-14	13:27	2024-03-14 13:27:00	Branta leucopsis	74	13.45	659	grassland	0	1					9
193	2024-03-14	13:47	2024-03-14 13:47:00	Anser anser	74	13.7833	7	grassland	0	1					7
194	2024-03-14	14:12	2024-03-14 14:12:00	Anser albifrons	74	14.2	45	grassland	0	1					10
194	2024-03-14	14:12	2024-03-14 14:12:00	Anser anser	74	14.2	45	grassland	0	1					25
194	2024-03-14	14:12	2024-03-14 14:12:00	Anser serrirostris	74	14.2	45	grassland	0	1					10
195	2024-03-14	14:54	2024-03-14 14:54:00	Anser albifrons	74	14.9	201	winter cereals	1	0	Yes	1	0	Anser albifrons	150
195	2024-03-14	14:54	2024-03-14 14:54:00	Anser serrirostris	74	14.9	201	winter cereals	1	0	Yes	1	0	Anser serrirostris	50
196	2024-03-14	15:04	2024-03-14 15:04:00	Anser albifrons	74	15.0667	1353	grassland	2	0	Yes	2	0	Anser albifrons	1300
196	2024-03-14	15:05	2024-03-14 15:05:00	Anser serrirostris	74	15.0833	1353	grassland	0	1					50
197	2024-03-14	15:28	2024-03-14 15:28:00	Anser albifrons	74	15.4667	3551	grassland	5	0	Yes	5	0	Anser albifrons	3500
197	2024-03-14	15:29	2024-03-14 15:29:00	Anser serrirostris	74	15.4833	3551	grassland	0	1					50
198	2024-03-14	15:38	2024-03-14 15:38:00	Anser albifrons	74	15.6333	600	grassland	0	1					550
198	2024-03-14	15:38	2024-03-14 15:38:00	Anser serrirostris	74	15.6333	600	grassland	0	1					50
199	2024-03-19	08:11	2024-03-19 08:11:00	Anser albifrons	79	8.18333	5503	grassland	7	0	Yes	7	0	Anser albifrons	5500
199	2024-03-19	08:12	2024-03-19 08:12:00	Anser anser	79	8.2	5503	grassland	0	1					1
199	2024-03-19	08:12	2024-03-19 08:12:00	Branta leucopsis	79	8.2	5503	grassland	0	1					2
200	2024-03-19	09:43	2024-03-19 09:43:00	Anser albifrons	79	9.71667	1402	grassland	4	0	Yes	4	0	Anser albifrons	1400
200	2024-03-19	09:43	2024-03-19 09:43:00	Anser serrirostris	79	9.71667	1402	grassland	0	1					2
201	2024-03-19	11:17	2024-03-19 11:17:00	Anser albifrons	79	11.2833	4310	grassland	2	0	Yes	2	0	Anser albifrons	4300
201	2024-03-19	11:18	2024-03-19 11:18:00	Branta leucopsis	79	11.3	4310	grassland	0	1					10
202	2024-03-19	12:36	2024-03-19 12:36:00	Anser albifrons	79	12.6	2652	grassland	2	0	Yes	2	0	Anser albifrons	2650
202	2024-03-19	12:37	2024-03-19 12:37:00	Branta leucopsis	79	12.6167	2652	grassland	0	1					2
203	2024-03-19	13:26	2024-03-19 13:26:00	Anser albifrons	79	13.4333	1711	grassland	3	0	Yes	3	0	Anser albifrons	1700
203	2024-03-19	13:31	2024-03-19 13:31:00	Branta leucopsis	79	13.5167	1711	grassland	0	1					8
203	2024-03-19	13:32	2024-03-19 13:32:00	Anser serrirostris	79	13.5333	1711	grassland	1	0	No	0	1	Anser albifrons	2
204	2024-03-19	14:01	2024-03-19 14:01:00	Anser albifrons	79	14.0167	380	winter cereals	3	0	Yes	3	0	Anser albifrons	280
204	2024-03-19	14:01	2024-03-19 14:01:00	Anser serrirostris	79	14.0167	380	winter cereals	1	0	No	0	1	Anser albifrons	100
205	2024-03-19	14:48	2024-03-19 14:48:00	Anser albifrons	79	14.8	2722	winter cereals	2	0	Yes	2	0	Anser albifrons	2650
205	2024-03-19	14:48	2024-03-19 14:48:00	Branta leucopsis	79	14.8	2722	winter cereals	0	1					2
205	2024-03-19	14:49	2024-03-19 14:49:00	Anser albifrons	79	14.8167	2722	other	0	1					10
205	2024-03-19	14:49	2024-03-19 14:49:00	Anser serrirostris	79	14.8167	2722	other	0	1					10
205	2024-03-19	14:49	2024-03-19 14:49:00	Anser serrirostris	79	14.8167	2722	winter cereals	0	1					50
206	2024-03-19	15:43	2024-03-19 15:43:00	Anser albifrons	79	15.7167	75	grassland	0	1					55
206	2024-03-19	15:44	2024-03-19 15:44:00	Anser serrirostris	79	15.7333	75	grassland	0	1					20
207	2024-03-19	16:01	2024-03-19 16:01:00	Anser albifrons	79	16.0167	600	grassland	3	0	Yes	3	0	Anser albifrons	500
207	2024-03-19	16:02	2024-03-19 16:02:00	Anser serrirostris	79	16.0333	600	grassland	0	1					100
208	2024-03-19	16:30	2024-03-19 16:30:00	Anser albifrons	79	16.5	1305	grassland	0	1					850
208	2024-03-19	16:30	2024-03-19 16:30:00	Anser albifrons	79	16.5	1305	winter cereals	1	0	Yes	1	0	Anser albifrons	450
208	2024-03-19	16:30	2024-03-19 16:30:00	Anser serrirostris	79	16.5	1305	grassland	0	1					5
209	2024-03-19	16:43	2024-03-19 16:43:00	Anser albifrons	79	16.7167	38	grassland	0	1					13
209	2024-03-19	16:43	2024-03-19 16:43:00	Anser anser	79	16.7167	38	grassland	0	1					25
210	2024-03-19	16:59	2024-03-19 16:59:00	Anser anser	79	16.9833	557	grassland	0	1					10
210	2024-03-19	17:00	2024-03-19 17:00:00	Anser albifrons	79	17	557	grassland	0	1					520
210	2024-03-19	17:00	2024-03-19 17:00:00	Anser serrirostris	79	17	557	grassland	0	1					1
210	2024-03-19	17:00	2024-03-19 17:00:00	Branta leucopsis	79	17	557	grassland	0	1					15
210	2024-03-19	17:01	2024-03-19 17:01:00	Anser serrirostris	79	17.0167	557	other	0	1					10
211	2024-03-19	17:13	2024-03-19 17:13:00	Anser albifrons	79	17.2167	920	grassland	2	0	Yes	2	0	Anser albifrons	920
212	2024-03-20	09:00	2024-03-20 09:00:00	Anser albifrons	80	9	1500	winter cereals	3	0	Yes	3	0	Anser albifrons	1100
212	2024-03-20	09:01	2024-03-20 09:01:00	Anser albifrons	80	9.01667	1500	grassland	2	0	Yes	2	0	Anser albifrons	400
213	2024-03-20	09:47	2024-03-20 09:47:00	Anser albifrons	80	9.78333	1570	winter cereals	3	0	Yes	3	0	Anser albifrons	700
213	2024-03-20	09:47	2024-03-20 09:47:00	Branta leucopsis	80	9.78333	1570	winter cereals	0	1					1
213	2024-03-20	09:48	2024-03-20 09:48:00	Anser albifrons	80	9.8	1570	other	1	0	Yes	1	0	Anser albifrons	50
213	2024-03-20	09:48	2024-03-20 09:48:00	Anser albifrons	80	9.8	1570	grassland	3	0	Yes	3	0	Anser albifrons	800
213	2024-03-20	09:49	2024-03-20 09:49:00	Branta leucopsis	80	9.81667	1570	grassland	0	1					19
214	2024-03-20	10:06	2024-03-20 10:06:00	Anser anser	80	10.1	7	grassland	0	1					7
215	2024-03-20	10:15	2024-03-20 10:15:00	Anser serrirostris	80	10.25	12	winter cereals	0	1					12
216	2024-03-20	10:32	2024-03-20 10:32:00	Anser albifrons	80	10.5333	513	other	1	0	Yes	1	0	Anser albifrons	500
216	2024-03-20	10:33	2024-03-20 10:33:00	Anser serrirostris	80	10.55	513	other	0	1					10
216	2024-03-20	10:33	2024-03-20 10:33:00	Anser serrirostris	80	10.55	513	winter cereals	0	1					3
217	2024-03-20	10:54	2024-03-20 10:54:00	Anser albifrons	80	10.9	1208	grassland	2	0	Yes	2	0	Anser albifrons	600
217	2024-03-20	10:54	2024-03-20 10:54:00	Branta leucopsis	80	10.9	1208	grassland	0	1					5
217	2024-03-20	10:55	2024-03-20 10:55:00	Anser albifrons	80	10.9167	1208	winter cereals	0	1					600
217	2024-03-20	10:55	2024-03-20 10:55:00	Branta leucopsis	80	10.9167	1208	winter cereals	0	1					3
218	2024-03-20	11:22	2024-03-20 11:22:00	Anser anser	80	11.3667	7	grassland	0	1					7
219	2024-03-20	11:49	2024-03-20 11:49:00	Anser albifrons	80	11.8167	240	grassland	0	1					210
219	2024-03-20	11:49	2024-03-20 11:49:00	Anser albifrons	80	11.8167	240	winter cereals	1	0	Yes	1	0	Anser albifrons	10
219	2024-03-20	11:49	2024-03-20 11:49:00	Anser serrirostris	80	11.8167	240	grassland	0	1					10
219	2024-03-20	11:50	2024-03-20 11:50:00	Anser serrirostris	80	11.8333	240	winter cereals	1	0	Yes	1	0	Anser serrirostris	10
220	2024-03-20	12:03	2024-03-20 12:03:00	Anser albifrons	80	12.05	3610	grassland	5	0	Yes	5	0	Anser albifrons	3600
220	2024-03-20	12:03	2024-03-20 12:03:00	Branta leucopsis	80	12.05	3610	grassland	0	1					6
220	2024-03-20	12:04	2024-03-20 12:04:00	Anser anser	80	12.0667	3610	grassland	0	1					4
221	2024-03-20	12:42	2024-03-20 12:42:00	Anser albifrons	80	12.7	1001	grassland	13	0	Yes	13	0	Anser albifrons	1000
221	2024-03-20	12:42	2024-03-20 12:42:00	Branta leucopsis	80	12.7	1001	winter cereals	0	1					1
222	2024-03-20	14:42	2024-03-20 14:42:00	Anser anser	80	14.7	17	grassland	0	1					15
222	2024-03-20	14:43	2024-03-20 14:43:00	Anser albifrons	80	14.7167	17	grassland	0	1					2
223	2024-03-20	15:02	2024-03-20 15:02:00	Anser albifrons	80	15.0333	2400	other	1	0	Yes	1	0	Anser albifrons	1100
223	2024-03-20	15:03	2024-03-20 15:03:00	Anser albifrons	80	15.05	2400	grassland	3	0	Yes	3	0	Anser albifrons	1300
224	2024-03-21	07:51	2024-03-21 07:51:00	Anser albifrons	81	7.85	4604	grassland	10	0	Yes	10	0	Anser albifrons	4600
224	2024-03-21	08:37	2024-03-21 08:37:00	Anser serrirostris	81	8.61667	4604	grassland	0	1					4
225	2024-03-21	08:47	2024-03-21 08:47:00	Anser albifrons	81	8.78333	3506	grassland	3	0	Yes	3	0	Anser albifrons	3500
225	2024-03-21	08:48	2024-03-21 08:48:00	Branta leucopsis	81	8.8	3506	grassland	0	1					6
226	2024-03-21	09:18	2024-03-21 09:18:00	Anser albifrons	81	9.3	1104	grassland	3	0	Yes	3	0	Anser albifrons	1100
226	2024-03-21	09:18	2024-03-21 09:18:00	Branta leucopsis	81	9.3	1104	grassland	0	1					4
227	2024-03-21	11:45	2024-03-21 11:45:00	Anser serrirostris	81	11.75	351	winter cereals	0	1					200
227	2024-03-21	11:46	2024-03-21 11:46:00	Anser albifrons	81	11.7667	351	winter cereals	3	0	Yes	3	0	Anser albifrons	150
228	2024-03-21	13:13	2024-03-21 13:13:00	Anser albifrons	81	13.2167	34	grassland	4	0	Yes	4	0	Anser albifrons	32
228	2024-03-21	13:13	2024-03-21 13:13:00	Anser anser	81	13.2167	34	grassland	0	1					2
229	2024-03-21	13:42	2024-03-21 13:42:00	Anser anser	81	13.7	17	grassland	1	0	Yes	1	0	Anser anser	17
230	2024-03-21	14:12	2024-03-21 14:12:00	Anser anser	81	14.2	5	grassland	2	0	Yes	2	0	Anser anser	5
231	2024-03-21	14:24	2024-03-21 14:24:00	Anser anser	81	14.4	13	grassland	1	0	Yes	1	0	Anser anser	13
232	2024-03-21	15:15	2024-03-21 15:15:00	Anser albifrons	81	15.25	730	other	5	0	Yes	5	0	Anser albifrons	730
233	2024-03-21	15:38	2024-03-21 15:38:00	Anser albifrons	81	15.6333	207	grassland	6	0	Yes	6	0	Anser albifrons	170
233	2024-03-21	15:38	2024-03-21 15:38:00	Anser albifrons	81	15.6333	207	winter cereals	1	0	Yes	1	0	Anser albifrons	30
233	2024-03-21	15:39	2024-03-21 15:39:00	Anser anser	81	15.65	207	grassland	0	1					7
234	2024-03-21	15:52	2024-03-21 15:52:00	Anser albifrons	81	15.8667	500	grassland	2	0	Yes	2	0	Anser albifrons	500
235	2024-03-21	16:07	2024-03-21 16:07:00	Anser albifrons	81	16.1167	48	winter cereals	1	0	Yes	1	0	Anser albifrons	16
235	2024-03-21	16:07	2024-03-21 16:07:00	Anser anser	81	16.1167	48	winter cereals	3	0	Yes	3	0	Anser anser	32
236	2024-03-21	16:30	2024-03-21 16:30:00	Anser albifrons	81	16.5	1794	winter cereals	3	0	Yes	3	0	Anser albifrons	100
236	2024-03-21	16:31	2024-03-21 16:31:00	Anser serrirostris	81	16.5167	1794	winter cereals	0	1					130
236	2024-03-21	16:32	2024-03-21 16:32:00	Anser albifrons	81	16.5333	1794	grassland	1	0	Yes	1	0	Anser albifrons	1550
236	2024-03-21	16:32	2024-03-21 16:32:00	Anser serrirostris	81	16.5333	1794	grassland	0	1					10
236	2024-03-21	16:32	2024-03-21 16:32:00	Branta leucopsis	81	16.5333	1794	grassland	0	1					4
237	2024-03-21	16:52	2024-03-21 16:52:00	Anser albifrons	81	16.8667	1803	grassland	6	0	Yes	6	0	Anser albifrons	1800
237	2024-03-21	16:52	2024-03-21 16:52:00	Branta leucopsis	81	16.8667	1803	grassland	0	1					3
238	2024-03-21	17:11	2024-03-21 17:11:00	Anser albifrons	81	17.1833	1151	winter cereals	0	1					1100
238	2024-03-21	17:12	2024-03-21 17:12:00	Anser serrirostris	81	17.2	1151	winter cereals	0	1					50
238	2024-03-21	17:12	2024-03-21 17:12:00	Branta leucopsis	81	17.2	1151	winter cereals	0	1					1
239	2024-03-22	09:00	2024-03-22 09:00:00	Anser albifrons	82	9	1600	grassland	5	0	Yes	5	0	Anser albifrons	1600
240	2024-03-22	09:17	2024-03-22 09:17:00	Anser albifrons	82	9.28333	3360	grassland	6	0	Yes	6	0	Anser albifrons	3300
240	2024-03-22	09:18	2024-03-22 09:18:00	Branta leucopsis	82	9.3	3360	grassland	1	0	Yes	1	0	Branta leucopsis	60
241	2024-03-22	13:04	2024-03-22 13:04:00	Anser albifrons	82	13.0667	480	grassland	2	0	Yes	2	0	Anser albifrons	450
241	2024-03-22	13:05	2024-03-22 13:05:00	Anser serrirostris	82	13.0833	480	grassland	0	1					30
242	2024-03-22	14:17	2024-03-22 14:17:00	Anser anser	82	14.2833	13	grassland	0	1					10
242	2024-03-22	14:18	2024-03-22 14:18:00	Anser albifrons	82	14.3	13	grassland	0	1					3
243	2024-03-22	14:30	2024-03-22 14:30:00	Anser anser	82	14.5	19	grassland	1	0	Yes	1	0	Anser anser	19
244	2024-03-22	14:41	2024-03-22 14:41:00	Anser albifrons	82	14.6833	166	grassland	3	0	Yes	3	0	Anser albifrons	160
244	2024-03-22	14:41	2024-03-22 14:41:00	Anser anser	82	14.6833	166	grassland	0	1					6
245	2024-03-22	14:57	2024-03-22 14:57:00	Anser albifrons	82	14.95	65	grassland	0	1					50
245	2024-03-22	14:57	2024-03-22 14:57:00	Anser anser	82	14.95	65	grassland	0	1					15
246	2024-03-22	15:08	2024-03-22 15:08:00	Anser albifrons	82	15.1333	270	winter cereals	0	1					270
247	2024-03-22	15:24	2024-03-22 15:24:00	Anser albifrons	82	15.4	1017	grassland	4	0	Yes	4	0	Anser albifrons	1000
247	2024-03-22	15:25	2024-03-22 15:25:00	Branta leucopsis	82	15.4167	1017	grassland	0	1					15
247	2024-03-22	15:26	2024-03-22 15:26:00	Anser anser	82	15.4333	1017	grassland	0	1					2
248	2024-03-22	15:36	2024-03-22 15:36:00	Anser albifrons	82	15.6	936	grassland	2	0	Yes	2	0	Anser albifrons	900
248	2024-03-22	15:37	2024-03-22 15:37:00	Branta leucopsis	82	15.6167	936	grassland	2	0	Yes	2	0	Branta leucopsis	36
249	2024-03-22	16:13	2024-03-22 16:13:00	Anser anser	82	16.2167	23	grassland	1	0	Yes	1	0	Anser anser	23
250	2024-03-22	16:37	2024-03-22 16:37:00	Anser albifrons	82	16.6167	60	grassland	2	0	Yes	2	0	Anser albifrons	60
251	2024-03-22	16:58	2024-03-22 16:58:00	Anser albifrons	82	16.9667	2200	grassland	1	0	Yes	1	0	Anser albifrons	2200
252	2024-03-26	09:58	2024-03-26 09:58:00	Anser albifrons	86	9.96667	1517	grassland	9	0	Yes	9	0	Anser albifrons	1500
252	2024-03-26	09:59	2024-03-26 09:59:00	Branta leucopsis	86	9.98333	1517	grassland	0	1					15
253	2024-03-26	12:35	2024-03-26 12:35:00	Anser albifrons	86	12.5833	7	grassland	0	1					5
253	2024-03-26	12:36	2024-03-26 12:36:00	Anser serrirostris	86	12.6	7	grassland	0	1					2
254	2024-03-26	12:58	2024-03-26 12:58:00	Anser anser	86	12.9667	6	grassland	0	1					6
255	2024-03-26	13:14	2024-03-26 13:14:00	Anser albifrons	86	13.2333	400	grassland	1	0	Yes	1	0	Anser albifrons	250
255	2024-03-26	13:14	2024-03-26 13:14:00	Anser serrirostris	86	13.2333	400	grassland	2	0	No	0	2	Anser albifrons	150
256	2024-03-26	13:23	2024-03-26 13:23:00	Anser albifrons	86	13.3833	200	grassland	0	1					70
256	2024-03-26	13:23	2024-03-26 13:23:00	Anser serrirostris	86	13.3833	200	grassland	3	0	Yes	3	0	Anser serrirostris	130
257	2024-03-26	13:57	2024-03-26 13:57:00	Anser albifrons	86	13.95	205	grassland	1	0	Yes	1	0	Anser albifrons	180
257	2024-03-26	13:58	2024-03-26 13:58:00	Anser anser	86	13.9667	205	grassland	0	1					5
257	2024-03-26	13:58	2024-03-26 13:58:00	Anser serrirostris	86	13.9667	205	grassland	0	1					20
258	2024-03-26	14:19	2024-03-26 14:19:00	Anser albifrons	86	14.3167	280	grassland	2	0	Yes	2	0	Anser albifrons	260
258	2024-03-26	14:20	2024-03-26 14:20:00	Anser serrirostris	86	14.3333	280	grassland	0	1					20
259	2024-03-26	14:50	2024-03-26 14:50:00	Anser albifrons	86	14.8333	552	grassland	5	0	Yes	5	0	Anser albifrons	550
259	2024-03-26	14:51	2024-03-26 14:51:00	Branta leucopsis	86	14.85	552	grassland	0	1					2
260	2024-03-26	15:33	2024-03-26 15:33:00	Anser albifrons	86	15.55	154	grassland	5	0	Yes	5	0	Anser albifrons	150
260	2024-03-26	15:33	2024-03-26 15:33:00	Anser anser	86	15.55	154	grassland	0	1					4
261	2024-03-26	15:46	2024-03-26 15:46:00	Anser albifrons	86	15.7667	87	grassland	4	0	Yes	4	0	Anser albifrons	80
261	2024-03-26	15:46	2024-03-26 15:46:00	Anser anser	86	15.7667	87	grassland	0	1					5
261	2024-03-26	15:46	2024-03-26 15:46:00	Branta leucopsis	86	15.7667	87	grassland	0	1					2
262	2024-03-26	16:09	2024-03-26 16:09:00	Anser anser	86	16.15	4	grassland	2	0	Yes	2	0	Anser anser	4
263	2024-03-26	16:54	2024-03-26 16:54:00	Anser albifrons	86	16.9	607	grassland	3	0	Yes	3	0	Anser albifrons	600
263	2024-03-26	16:55	2024-03-26 16:55:00	Branta leucopsis	86	16.9167	607	grassland	0	1					6
264	2024-03-26	17:14	2024-03-26 17:14:00	Anser albifrons	86	17.2333	170	grassland	2	0	Yes	2	0	Anser albifrons	160
264	2024-03-26	17:14	2024-03-26 17:14:00	Anser anser	86	17.2333	170	grassland	1	0	Yes	1	0	Anser anser	10
265	2024-03-26	17:22	2024-03-26 17:22:00	Anser albifrons	86	17.3667	16	grassland	0	1					4
265	2024-03-26	17:22	2024-03-26 17:22:00	Anser anser	86	17.3667	16	grassland	3	0	Yes	3	0	Anser anser	12
266	2024-03-26	17:47	2024-03-26 17:47:00	Anser albifrons	86	17.7833	554	grassland	1	0	Yes	1	0	Anser albifrons	550
266	2024-03-26	17:48	2024-03-26 17:48:00	Anser anser	86	17.8	554	grassland	0	1					4
267	2024-03-27	10:19	2024-03-27 10:19:00	Anser anser	87	10.3167	3	grassland	0	1					3
268	2024-03-27	10:38	2024-03-27 10:38:00	Anser anser	87	10.6333	5	grassland	0	1					5
269	2024-03-27	11:07	2024-03-27 11:07:00	Anser anser	87	11.1167	9	grassland	1	0	Yes	1	0	Anser anser	9
270	2024-03-27	11:18	2024-03-27 11:18:00	Anser anser	87	11.3	4	grassland	0	1					4
271	2024-03-27	12:04	2024-03-27 12:04:00	Anser anser	87	12.0667	9	grassland	0	1					9
272	2024-03-27	12:56	2024-03-27 12:56:00	Anser anser	87	12.9333	10	grassland	3	0	Yes	3	0	Anser anser	10
273	2024-03-27	13:13	2024-03-27 13:13:00	Anser anser	87	13.2167	27	grassland	2	0	Yes	2	0	Anser anser	25
273	2024-03-27	13:14	2024-03-27 13:14:00	Anser albifrons	87	13.2333	27	grassland	0	1					2
274	2024-03-27	13:28	2024-03-27 13:28:00	Anser albifrons	87	13.4667	410	grassland	3	0	Yes	3	0	Anser albifrons	400
274	2024-03-27	13:28	2024-03-27 13:28:00	Branta leucopsis	87	13.4667	410	grassland	0	1					10
275	2024-03-27	13:59	2024-03-27 13:59:00	Anser albifrons	87	13.9833	26	grassland	1	0	Yes	1	0	Anser albifrons	4
275	2024-03-27	14:00	2024-03-27 14:00:00	Anser anser	87	14	26	grassland	0	1					22
276	2024-03-27	14:32	2024-03-27 14:32:00	Anser albifrons	87	14.5333	20	grassland	0	1					13
276	2024-03-27	14:32	2024-03-27 14:32:00	Anser anser	87	14.5333	20	grassland	0	1					7
277	2024-03-27	14:58	2024-03-27 14:58:00	Anser albifrons	87	14.9667	235	grassland	0	1					220
277	2024-03-27	14:58	2024-03-27 14:58:00	Anser anser	87	14.9667	235	grassland	0	1					15
278	2024-03-27	15:20	2024-03-27 15:20:00	Anser anser	87	15.3333	9	grassland	1	0	Yes	1	0	Anser anser	9
279	2024-03-27	15:51	2024-03-27 15:51:00	Anser albifrons	87	15.85	608	grassland	4	0	Yes	4	0	Anser albifrons	600
279	2024-03-27	15:51	2024-03-27 15:51:00	Branta leucopsis	87	15.85	608	grassland	0	1					8
280	2024-03-27	16:31	2024-03-27 16:31:00	Anser albifrons	87	16.5167	187	grassland	3	0	Yes	3	0	Anser albifrons	160
280	2024-03-27	16:32	2024-03-27 16:32:00	Anser anser	87	16.5333	187	grassland	0	1					25
280	2024-03-27	16:32	2024-03-27 16:32:00	Branta leucopsis	87	16.5333	187	grassland	0	1					2
281	2024-03-27	16:44	2024-03-27 16:44:00	Anser albifrons	87	16.7333	41	grassland	0	1					7
281	2024-03-27	16:44	2024-03-27 16:44:00	Anser anser	87	16.7333	41	grassland	4	0	Yes	4	0	Anser anser	34
282	2024-03-27	17:01	2024-03-27 17:01:00	Anser albifrons	87	17.0167	651	winter cereals	2	0	Yes	2	0	Anser albifrons	250
282	2024-03-27	17:01	2024-03-27 17:01:00	Anser serrirostris	87	17.0167	651	winter cereals	1	0	No	0	1	Anser albifrons	400
283	2024-03-27	17:07	2024-03-27 17:07:00	Anser serrirostris	87	17.1167	70	winter cereals	4	0	Yes	4	0	Anser serrirostris	60
283	2024-03-27	17:08	2024-03-27 17:08:00	Anser albifrons	87	17.1333	70	winter cereals	0	1					10
284	2024-03-27	17:14	2024-03-27 17:14:00	Anser albifrons	87	17.2333	400	winter cereals	0	1					150
284	2024-03-27	17:14	2024-03-27 17:14:00	Anser serrirostris	87	17.2333	400	winter cereals	2	0	Yes	2	0	Anser serrirostris	250
285	2024-03-28	08:36	2024-03-28 08:36:00	Anser albifrons	88	8.6	271	grassland	6	0	Yes	6	0	Anser albifrons	270
285	2024-03-28	08:37	2024-03-28 08:37:00	Anser albifrons	88	8.61667	271	grassland	0	1					1
286	2024-03-28	10:12	2024-03-28 10:12:00	Anser albifrons	88	10.2	190	grassland	0	1					80
286	2024-03-28	10:12	2024-03-28 10:12:00	Anser serrirostris	88	10.2	190	grassland	1	0	Yes	1	0	Anser serrirostris	110
287	2024-03-28	10:38	2024-03-28 10:38:00	Anser albifrons	88	10.6333	220	grassland	0	1					220
288	2024-03-28	11:00	2024-03-28 11:00:00	Anser albifrons	88	11	469	winter cereals	3	0	Yes	3	0	Anser albifrons	360
288	2024-03-28	11:01	2024-03-28 11:01:00	Anser serrirostris	88	11.0167	469	winter cereals	0	1					50
288	2024-03-28	11:02	2024-03-28 11:02:00	Anser albifrons	88	11.0333	469	other	0	1					50
288	2024-03-28	11:02	2024-03-28 11:02:00	Branta leucopsis	88	11.0333	469	other	0	1					5
288	2024-03-28	11:02	2024-03-28 11:02:00	Branta leucopsis	88	11.0333	469	winter cereals	0	1					4
289	2024-03-28	11:38	2024-03-28 11:38:00	Anser anser	88	11.6333	4	grassland	0	1					4
290	2024-03-28	12:31	2024-03-28 12:31:00	Anser albifrons	88	12.5167	230	grassland	1	0	Yes	1	0	Anser albifrons	230
291	2024-03-28	12:50	2024-03-28 12:50:00	Anser anser	88	12.8333	25	grassland	2	0	Yes	2	0	Anser anser	10
291	2024-03-28	13:34	2024-03-28 13:34:00	Anser anser	88	13.5667	25	grassland	1	0	Yes	1	0	Anser anser	13
291	2024-03-28	13:35	2024-03-28 13:35:00	Anser albifrons	88	13.5833	25	grassland	0	1					2
292	2024-03-28	13:56	2024-03-28 13:56:00	Anser anser	88	13.9333	5	grassland	0	1					5
293	2024-03-28	14:26	2024-03-28 14:26:00	Anser anser	88	14.4333	10	grassland	0	1					10
294	2024-03-28	14:49	2024-03-28 14:49:00	Anser albifrons	88	14.8167	1176	grassland	3	0	Yes	3	0	Anser albifrons	1150
294	2024-03-28	14:49	2024-03-28 14:49:00	Branta leucopsis	88	14.8167	1176	grassland	0	1					21
294	2024-03-28	14:50	2024-03-28 14:50:00	Anser anser	88	14.8333	1176	grassland	0	1					2
294	2024-03-28	15:10	2024-03-28 15:10:00	Anser albifrons	88	15.1667	1176	grassland	0	1					1
295	2024-03-28	15:36	2024-03-28 15:36:00	Anser albifrons	88	15.6	135	grassland	1	0	Yes	1	0	Anser albifrons	120
295	2024-03-28	15:36	2024-03-28 15:36:00	Anser anser	88	15.6	135	grassland	2	0	Yes	2	0	Anser anser	15
296	2024-03-28	16:14	2024-03-28 16:14:00	Anser albifrons	88	16.2333	140	grassland	0	1					30
296	2024-03-28	16:16	2024-03-28 16:16:00	Anser albifrons	88	16.2667	140	winter cereals	1	0	Yes	1	0	Anser albifrons	20
296	2024-03-28	16:16	2024-03-28 16:16:00	Anser serrirostris	88	16.2667	140	winter cereals	1	0	Yes	1	0	Anser serrirostris	80
296	2024-03-28	16:16	2024-03-28 16:16:00	Anser serrirostris	88	16.2667	140	grassland	0	1					10
297	2024-03-28	16:46	2024-03-28 16:46:00	Anser albifrons	88	16.7667	407	winter cereals	1	0	Yes	1	0	Anser albifrons	400
297	2024-03-28	16:46	2024-03-28 16:46:00	Anser serrirostris	88	16.7667	407	winter cereals	0	1					2
297	2024-03-28	16:47	2024-03-28 16:47:00	Branta leucopsis	88	16.7833	407	winter cereals	1	0	No	0	1	Anser albifrons	5
298	2024-03-28	17:06	2024-03-28 17:06:00	Anser albifrons	88	17.1	1704	winter cereals	4	0	Yes	4	0	Anser albifrons	1700
298	2024-03-28	17:06	2024-03-28 17:06:00	Branta leucopsis	88	17.1	1704	winter cereals	0	1					4
299	2024-04-02	09:52:42	2024-04-02 09:52:00	Anser anser	93	9.86667	3	grassland	0	1					3
300	2024-04-02	10:00:18	2024-04-02 10:00:00	Anser anser	93	10	4	grassland	0	1					4
301	2024-04-02	10:38:52	2024-04-02 10:38:00	Anser anser	93	10.6333	4	grassland	1	0	Yes	1	0	Anser anser	4
302	2024-04-02	10:53:04	2024-04-02 10:53:00	Anser anser	93	10.8833	9	grassland	0	1					9
303	2024-04-02	11:37:34	2024-04-02 11:37:00	Anser anser	93	11.6167	12	grassland	0	1					12
305	2024-04-02	11:49:02	2024-04-02 11:49:00	Anser anser	93	11.8167	7	grassland	1	0	Yes	1	0	Anser anser	7
304	2024-04-02	11:50:06	2024-04-02 11:50:00	Anser anser	93	11.8333	4	grassland	0	1					4
306	2024-04-02	12:09:00	2024-04-02 12:09:00	Anser anser	93	12.15	12	grassland	0	1					12
307	2024-04-02	12:24:20	2024-04-02 12:24:00	Anser anser	93	12.4	6	grassland	0	1					6
308	2024-04-02	12:57:50	2024-04-02 12:57:00	Anser anser	93	12.95	8	grassland	0	1					8
309	2024-04-02	13:08:24	2024-04-02 13:08:00	Anser anser	93	13.1333	105	grassland	0	1					100
309	2024-04-02	13:08:54	2024-04-02 13:08:00	Anser albifrons	93	13.1333	105	grassland	0	1					5
310	2024-04-02	13:46:36	2024-04-02 13:46:00	Anser anser	93	13.7667	24	grassland	0	1					20
311	2024-04-02	14:20:36	2024-04-02 14:20:00	Anser albifrons	93	14.3333	346	grassland	1	0	Yes	1	0	Anser albifrons	260
311	2024-04-02	14:21:14	2024-04-02 14:21:00	Anser anser	93	14.35	346	grassland	0	1					15
311	2024-04-02	14:21:30	2024-04-02 14:21:00	Branta leucopsis	93	14.35	346	grassland	1	0	Yes	1	0	Branta leucopsis	71
312	2024-04-02	14:29:00	2024-04-02 14:29:00	Anser anser	93	14.4833	7	grassland	0	1					7
313	2024-04-02	14:55:40	2024-04-02 14:55:00	Anser anser	93	14.9167	33	grassland	0	1					32
313	2024-04-02	14:56:20	2024-04-02 14:56:00	Anser albifrons	93	14.9333	33	grassland	0	1					1
314	2024-04-02	15:43:06	2024-04-02 15:43:00	Anser anser	93	15.7167	29	grassland	0	1					29
315	2024-04-02	15:53:24	2024-04-02 15:53:00	Anser anser	93	15.8833	41	winter cereals	0	1					12
315	2024-04-02	15:54:14	2024-04-02 15:54:00	Anser anser	93	15.9	41	other	0	1					18
315	2024-04-02	15:54:50	2024-04-02 15:54:00	Anser anser	93	15.9	41	other	0	1					11
316	2024-04-02	16:09:36	2024-04-02 16:09:00	Anser anser	93	16.15	45	grassland	0	1					45
317	2024-04-02	16:17:08	2024-04-02 16:17:00	Anser anser	93	16.2833	50	grassland	1	0	Yes	1	0	Anser anser	10
317	2024-04-02	16:17:42	2024-04-02 16:17:00	Anser albifrons	93	16.2833	50	grassland	0	1					40
318	2024-04-02	16:37:20	2024-04-02 16:37:00	Anser anser	93	16.6167	6	grassland	5	0	Yes	5	0	Anser anser	6
319	2024-04-03	07:37:04	2024-04-03 07:37:00	Anser anser	94	7.61667	5	grassland	1	0	Yes	1	0	Anser anser	5
320	2024-04-03	08:11:24	2024-04-03 08:11:00	Anser anser	94	8.18333	8	grassland	0	1					8
321	2024-04-03	12:30:44	2024-04-03 12:30:00	Anser anser	94	12.5	18	grassland	0	1					18
322	2024-04-03	12:31:06	2024-04-03 12:31:00	Anser anser	94	12.5167	10	grassland	1	0	Yes	1	0	Anser anser	9
322	2024-04-03	12:31:26	2024-04-03 12:31:00	Anser albifrons	94	12.5167	10	grassland	0	1					1
323	2024-04-03	12:37:56	2024-04-03 12:37:00	Anser anser	94	12.6167	7	grassland	0	1					5
323	2024-04-03	12:38:28	2024-04-03 12:38:00	Anser albifrons	94	12.6333	7	grassland	0	1					2
324	2024-04-03	12:54:12	2024-04-03 12:54:00	Anser albifrons	94	12.9	25	grassland	1	0	Yes	1	0	Anser albifrons	11
324	2024-04-03	13:38:16	2024-04-03 13:38:00	Anser anser	94	13.6333	25	grassland	1	0	Yes	1	0	Anser anser	14
325	2024-04-03	14:27:38	2024-04-03 14:27:00	Anser anser	94	14.45	10	grassland	1	0	Yes	1	0	Anser anser	10
326	2024-04-03	14:37:16	2024-04-03 14:37:00	Anser anser	94	14.6167	31	grassland	1	0	Yes	1	0	Anser anser	31
327	2024-04-03	15:29:22	2024-04-03 15:29:00	Anser anser	94	15.4833	48	grassland	0	1					30
327	2024-04-03	15:29:54	2024-04-03 15:29:00	Anser albifrons	94	15.4833	48	grassland	0	1					18
328	2024-04-03	15:38:56	2024-04-03 15:38:00	Anser albifrons	94	15.6333	169	grassland	0	1					110
328	2024-04-03	15:39:34	2024-04-03 15:39:00	Branta leucopsis	94	15.65	169	grassland	1	0	Yes	1	0	Branta leucopsis	59
329	2024-04-03	16:04:02	2024-04-03 16:04:00	Anser anser	94	16.0667	30	grassland	1	0	Yes	1	0	Anser anser	28
329	2024-04-03	16:04:30	2024-04-03 16:04:00	Anser albifrons	94	16.0667	30	grassland	0	1					2
330	2024-04-03	16:27:34	2024-04-03 16:27:00	Anser anser	94	16.45	39	grassland	0	1					39
331	2024-04-03	16:45:00	2024-04-03 16:45:00	Anser anser	94	16.75	41	other	0	1					21
331	2024-04-03	16:45:42	2024-04-03 16:45:00	Anser anser	94	16.75	41	winter cereals	0	1					14
331	2024-04-03	16:46:50	2024-04-03 16:46:00	Anser anser	94	16.7667	41	grassland	0	1					4
331	2024-04-03	16:47:28	2024-04-03 16:47:00	Anser albifrons	94	16.7833	41	grassland	0	1					2
332	2024-04-03	16:58:56	2024-04-03 16:58:00	Anser serrirostris	94	16.9667	40	other	1	0	Yes	1	0	Anser serrirostris	40
333	2024-04-03	17:33:18	2024-04-03 17:33:00	Anser serrirostris	94	17.55	60	grassland	0	1					60
334	2024-04-03	17:34:28	2024-04-03 17:34:00	Anser serrirostris	94	17.5667	375	other	1	0	Yes	1	0	Anser serrirostris	320
334	2024-04-03	17:35:12	2024-04-03 17:35:00	Anser serrirostris	94	17.5833	375	grassland	0	1					40
334	2024-04-03	17:35:58	2024-04-03 17:35:00	Anser albifrons	94	17.5833	375	grassland	0	1					10
334	2024-04-03	17:36:16	2024-04-03 17:36:00	Anser albifrons	94	17.6	375	other	0	1					5
335	2024-04-03	17:49:56	2024-04-03 17:49:00	Anser serrirostris	94	17.8167	140	winter cereals	4	0	Yes	4	0	Anser serrirostris	140
336	2024-04-08	12:23:40	2024-04-08 12:23:00	Anser anser	99	12.3833	12	grassland	0	1					12
337	2024-04-08	13:37:32	2024-04-08 13:37:00	Anser anser	99	13.6167	5	grassland	0	1					5
338	2024-04-08	13:50:54	2024-04-08 13:50:00	Anser anser	99	13.8333	4	grassland	0	1					2
338	2024-04-08	13:51:16	2024-04-08 13:51:00	Anser albifrons	99	13.85	4	grassland	0	1					2
339	2024-04-08	14:39:22	2024-04-08 14:39:00	Anser anser	99	14.65	3	grassland	0	1					3
340	2024-04-08	15:14:04	2024-04-08 15:14:00	Anser anser	99	15.2333	8	grassland	0	1					8
341	2024-04-08	15:20:46	2024-04-08 15:20:00	Anser anser	99	15.3333	7	grassland	0	1					7
342	2024-04-08	16:28:32	2024-04-08 16:28:00	Anser serrirostris	99	16.4667	560	grassland	2	0	Yes	2	0	Anser serrirostris	520
342	2024-04-08	16:29:08	2024-04-08 16:29:00	Anser albifrons	99	16.4833	560	grassland	0	1					20
342	2024-04-08	16:29:28	2024-04-08 16:29:00	Anser anser	99	16.4833	560	grassland	1	0	No	0	1	Anser serrirostris	20
343	2024-04-08	17:14:06	2024-04-08 17:14:00	Anser anser	99	17.2333	38	grassland	2	0	Yes	2	0	Anser anser	38
344	2024-04-08	17:22:18	2024-04-08 17:22:00	Anser anser	99	17.3667	37	grassland	0	1					37
345	2024-04-09	11:02:32	2024-04-09 11:02:00	Anser anser	100	11.0333	29	grassland	2	0	Yes	2	0	Anser anser	29
346	2024-04-09	12:11:04	2024-04-09 12:11:00	Anser anser	100	12.1833	9	grassland	0	1					9
347	2024-04-09	13:21:28	2024-04-09 13:21:00	Anser anser	100	13.35	5	grassland	0	1					5
348	2024-04-09	14:05:04	2024-04-09 14:05:00	Anser anser	100	14.0833	6	grassland	0	1					6
349	2024-04-09	15:45:36	2024-04-09 15:45:00	Anser anser	100	15.75	35	grassland	0	1					35
350	2024-04-09	15:51:58	2024-04-09 15:51:00	Anser anser	100	15.85	14	grassland	0	1					4
350	2024-04-09	16:06:00	2024-04-09 16:06:00	Anser anser	100	16.1	14	grassland	1	0	Yes	1	0	Anser anser	10
351	2024-04-09	17:50:40	2024-04-09 17:50:00	Anser anser	100	17.8333	7	grassland	0	1					7
352	2024-04-09	18:17:04	2024-04-09 18:17:00	Anser anser	100	18.2833	14	grassland	2	0	Yes	2	0	Anser anser	14
353	2024-04-09	18:42:02	2024-04-09 18:42:00	Anser albifrons	100	18.7	30	grassland	2	0	Yes	2	0	Anser albifrons	25
353	2024-04-09	18:43:26	2024-04-09 18:43:00	Branta leucopsis	100	18.7167	30	grassland	0	1					2
353	2024-04-09	18:44:10	2024-04-09 18:44:00	Anser anser	100	18.7333	30	grassland	0	1					3
354	2024-04-10	07:35:20	2024-04-10 07:35:00	Anser anser	101	7.58333	7	grassland	0	1					7
355	2024-04-10	09:01:32	2024-04-10 09:01:00	Anser anser	101	9.01667	7	grassland	1	0	Yes	1	0	Anser anser	7
356	2024-04-10	11:22:48	2024-04-10 11:22:00	Anser anser	101	11.3667	5	grassland	0	1					5
357	2024-04-10	11:35:52	2024-04-10 11:35:00	Anser serrirostris	101	11.5833	320	grassland	4	0	Yes	4	0	Anser serrirostris	310
357	2024-04-10	11:36:50	2024-04-10 11:36:00	Anser albifrons	101	11.6	320	grassland	0	1					10
358	2024-04-10	13:01:26	2024-04-10 13:01:00	Anser albifrons	101	13.0167	807	grassland	1	0	No	0	1	Anser serrirostris	100
358	2024-04-10	13:01:26	2024-04-10 13:01:00	Anser albifrons	101	13.0167	807	grassland	4	0	Yes	4	0	Anser albifrons	100
358	2024-04-10	13:02:12	2024-04-10 13:02:00	Anser serrirostris	101	13.0333	807	grassland	6	0	Yes	6	0	Anser serrirostris	600
358	2024-04-10	13:02:48	2024-04-10 13:02:00	Branta leucopsis	101	13.0333	807	grassland	0	1					7
359	2024-04-10	13:21:26	2024-04-10 13:21:00	Anser serrirostris	101	13.35	219	grassland	0	1					150
359	2024-04-10	13:21:50	2024-04-10 13:21:00	Anser albifrons	101	13.35	219	grassland	0	1					20
359	2024-04-10	13:22:12	2024-04-10 13:22:00	Anser anser	101	13.3667	219	grassland	0	1					4
359	2024-04-10	16:05:50	2024-04-10 16:05:00	Anser anser	101	16.0833	219	grassland	0	1					45
360	2024-04-10	16:58:26	2024-04-10 16:58:00	Anser anser	101	16.9667	10	grassland	5	0	Yes	5	0	Anser anser	10
361	2024-04-10	17:16:10	2024-04-10 17:16:00	Anser anser	101	17.2667	16	grassland	0	1					16

## Sheet: Info
variable	description
flock_id	Unique flock identity (random effect in GLMM)
Date	Observation date
time	Original observation time
datetime	Combined date-time (Europe/Warsaw)
spec	Species observed
doy	Day of year
hour	Hour of day (decimal)
flock_size	Total flock size (all species combined)
habitat	Foraging habitat
yes_agress	Number of aggressive acts observed in flock
non_agress	Number of non-aggressive individuals
same_species	Was aggression directed at conspecifics?
same_agress	Number of intraspecific aggression events
other_agress	Number of interspecific aggression events
agress_toward	Target species if interspecific aggression occurred
abundance	Number of individuals of this species in flock
